# Supplementary material for: Theoretical screening of bistriazole-derived energetic salts with high energetic properties and low sensitivity
Source: Royal Society of Chemistry journal article supplement (doi:10.1039/c9ra05141d), 2019-01-01
Supplement: c9ra05141d1.pdf [file c9ra05141d1.pdf]

## Supporting Information

Theoretical screening of bistriazole-derived energetic salts with high energetic properties and low sensitivity

Xiao-Hong Li <sup>1</sup>, Cong Zhang <sup>2</sup>, Xue-Hai Ju <sup>2\*</sup>

<sup>1</sup> College of Physics and Engineering, Henan University of Science and Technology, Luoyang, 471003, China;

<sup>2</sup> Key Laboratory of Soft Chemistry and Functional Materials of MOE, School of Chemical Engineering, Nanjing University of Science and Technology, Nanjing 210094, P. R. China.

### Contents

**Scheme S1.** Born–Haber energy cycle for the formation of the salts

**Scheme S2.** Isodesmic reactions for the anions

**Scheme S3.** Born–Haber cycle for the formation of the salts

**Table S1.** Volumes (cm<sup>3</sup> mol<sup>-1</sup>) and densities (g cm<sup>-3</sup>) of the salts

**Table S2.** Calculated and experimental gas-phase heats of formation (kJ mol<sup>-1</sup>) for small molecules and ions at 298 K

**Table S3.** The HOFs (kJ mol<sup>-1</sup>) of cage anions, ammonium-based cation, and their salts and lattice energies of these salts

**Table S4.** Predicted entropies ( $S_{\text{salt}}$ ), entropies of reaction ( $\Delta S_{\text{rxn}}$ ), enthalpies of reaction ( $\Delta H_{\text{rxn}}$ ), and free energies of reaction ( $\Delta G_{\text{rxn}}$ ) of the salts

**Figure S1.** Optimized crystal structure of the **B6**

**Figure S2.** Optimized structures of the related anions and cations

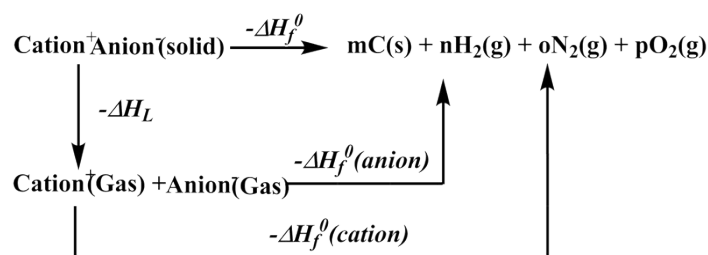

**Scheme S1.** Born–Haber energy cycle for the formation of the salts

\* Corresponding author: email: xhju@njust.edu.cn

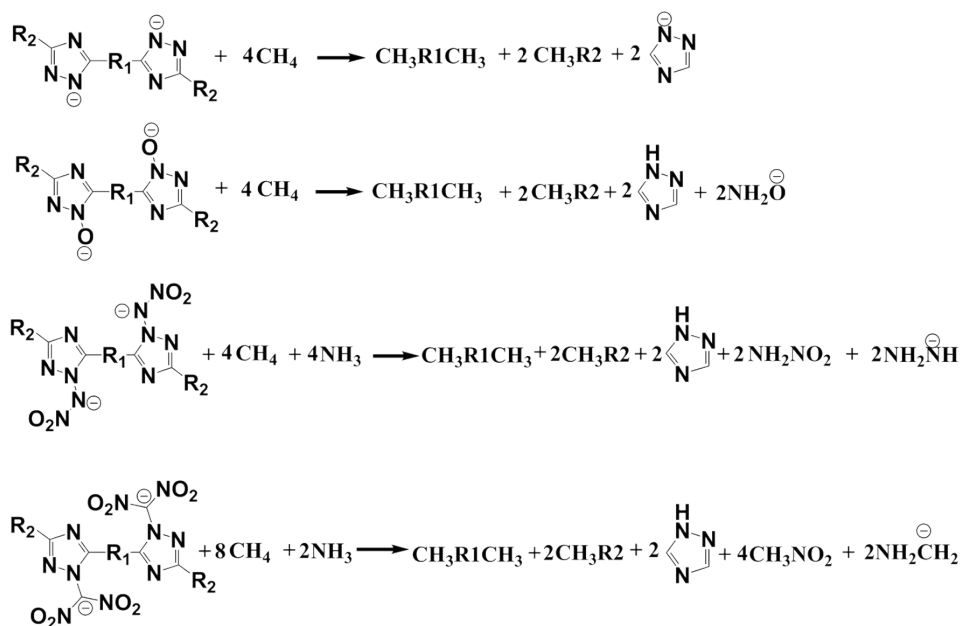

Scheme S2. Isodesmic reactions for the anions.

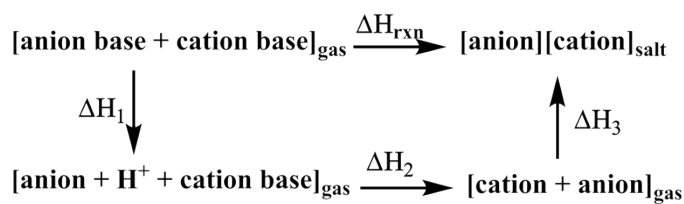

Scheme S3. Born–Haber cycle for the formation of the salts

Table S1. Volumes ( $\text{cm}^3 \text{mol}^{-1}$ ) and densities ( $\text{g cm}^{-3}$ ) of the salts

| Salts | $V$    | $A_s^+$ | $V_s^+$ | $A_s^-$ | $V_s^-$ | $\rho$                   |
|-------|--------|---------|---------|---------|---------|--------------------------|
| A1    | 163.05 | 61.68   | 152.51  | 226.28  | -155.43 | 1.71                     |
| A2    | 171.32 | 61.68   | 152.51  | 242.08  | -149.09 | 1.73                     |
| A3    | 181.02 | 61.68   | 152.51  | 256.75  | -142.99 | 1.73                     |
| A4    | 178.56 | 61.68   | 152.51  | 253.89  | -144.84 | 1.74                     |
| A5    | 184.77 | 61.68   | 152.51  | 261.83  | -143.45 | 1.77                     |
| A6    | 261.68 | 61.68   | 152.51  | 359.28  | -128.75 | 1.92 (1.97) <sup>a</sup> |
| A7    | 269.1  | 61.68   | 152.51  | 374.25  | -124.67 | 1.93                     |
| A8    | 281.83 | 61.68   | 152.51  | 390.81  | -120.27 | 1.91                     |
| A9    | 276.56 | 61.68   | 152.51  | 386.7   | -121.91 | 1.93                     |
| A10   | 285.51 | 61.68   | 152.51  | 391.61  | -125.58 | 1.93                     |
| B1    | 176.44 | 61.68   | 152.51  | 242.56  | -150.35 | 1.77 (1.9) <sup>b</sup>  |
| B2    | 185.76 | 61.68   | 152.51  | 261.73  | -144.35 | 1.78                     |
| B3    | 194.26 | 61.68   | 152.51  | 275.96  | -138.11 | 1.78                     |
| B4    | 188.57 | 61.68   | 152.51  | 272.3   | -140.87 | 1.82                     |
| B5    | 197.62 | 61.68   | 152.51  | 278.92  | -139.28 | 1.82                     |
| B6    | 271.38 | 61.68   | 152.51  | 376     | -125.69 | 1.98 (1.99) <sup>c</sup> |
| B7    | 282.51 | 61.68   | 152.51  | 394.76  | -122.14 | 1.96                     |

|     |        |       |        |        |         |                          |
|-----|--------|-------|--------|--------|---------|--------------------------|
| B8  | 293.52 | 61.68 | 152.51 | 417.69 | -115.54 | 1.95                     |
| B9  | 289.18 | 61.68 | 152.51 | 404.98 | -119.51 | 1.96                     |
| B10 | 291.16 | 61.68 | 152.51 | 405.19 | -123.93 | 2.00                     |
| C1  | 213.38 | 61.68 | 152.51 | 315.31 | -135.61 | 1.90 (1.86) <sup>d</sup> |
| C2  | 223.08 | 61.68 | 152.51 | 325.43 | -131.88 | 1.90                     |
| C3  | 238.1  | 61.68 | 152.51 | 344.52 | -127.2  | 1.86                     |
| C4  | 238.21 | 61.68 | 152.51 | 342.94 | -128.36 | 1.85                     |
| C5  | 238.24 | 61.68 | 152.51 | 349.69 | -126.17 | 1.91                     |
| C6  | 323.85 | 61.68 | 152.51 | 446.43 | -119.36 | 1.96                     |
| C7  | 331.41 | 61.68 | 152.51 | 447.13 | -117.51 | 1.97                     |
| C8  | 334.08 | 61.68 | 152.51 | 475    | -112.62 | 2.00                     |
| C9  | 337.31 | 61.68 | 152.51 | 476.92 | -112.18 | 1.97                     |
| C10 | 341.41 | 61.68 | 152.51 | 482.45 | -111.35 | 2.00                     |
| D1  | 259.48 | 61.68 | 152.51 | 366.5  | -127.63 | 1.94 (1.86) <sup>e</sup> |
| D2  | 271.2  | 61.68 | 152.51 | 385.15 | -122.44 | 1.92                     |
| D3  | 281.28 | 61.68 | 152.51 | 401.41 | -117.95 | 1.91                     |
| D4  | 277.28 | 61.68 | 152.51 | 401.87 | -119.11 | 1.93                     |
| D5  | 281.85 | 61.68 | 152.51 | 399.77 | -120.9  | 1.95                     |
| D6  | 355.11 | 61.68 | 152.51 | 499.74 | -114.63 | 2.05                     |
| D7  | 371.82 | 61.68 | 152.51 | 511.85 | -111.36 | 2.01                     |
| D8  | 380.91 | 61.68 | 152.51 | 531.56 | -106.36 | 2.01                     |
| D9  | 381.98 | 61.68 | 152.51 | 535.38 | -107.19 | 2.00                     |
| D10 | 375.36 | 61.68 | 152.51 | 534.93 | -107.5  | 2.07                     |

<sup>a</sup> The value is from Ref<sup>1</sup>; <sup>b</sup> The value is from Ref<sup>2</sup>; <sup>c</sup> At the B3LYP/aug-cc-pVTZ level; <sup>d</sup> The value is from Ref<sup>3</sup>; <sup>e</sup> The value is from Ref<sup>4</sup>.

**Table S2.** Calculated and experimental gas-phase heats of formation (kJ mol<sup>-1</sup>) for small molecules and ions at 298 K

| Molecules/ions                                   | $\Delta H_f^\circ$ (calculated) | $\Delta H_f^\circ$ (literature) |
|--------------------------------------------------|---------------------------------|---------------------------------|
| CH <sub>4</sub>                                  | -73.6                           | -74.4 <sup>a</sup>              |
| NH <sub>3</sub>                                  | -45.3                           | -46.1 <sup>a</sup>              |
| CH <sub>3</sub> NO <sub>2</sub>                  | -85.9                           | -80.8 <sup>a</sup>              |
| CH <sub>3</sub> C(NO <sub>2</sub> ) <sub>3</sub> | -23.2                           |                                 |
| NH <sub>2</sub> NO <sub>2</sub>                  | -3.9                            | -3.2 <sup>a</sup>               |
| CH <sub>3</sub> CH <sub>3</sub>                  | -84                             | -87 <sup>a</sup>                |
| CH <sub>3</sub> NHCH <sub>3</sub>                | -18.8                           | -19.1 <sup>a</sup>              |
| CH <sub>3</sub> NHNHCH <sub>3</sub>              | 92.2                            | 93.5 <sup>a</sup>               |
| CH <sub>3</sub> N=NCH <sub>3</sub>               | 151.5                           | 153.2 <sup>a</sup>              |
| CH <sub>3</sub> N=N(O)CH <sub>3</sub>            | -40.16                          |                                 |
| 1,2,4-triazole                                   | 192.9                           | 192.9 <sup>a</sup>              |
| H <sup>+</sup>                                   |                                 | 1536.2                          |
| NH <sub>2</sub> O <sup>-</sup>                   | 37.21 <sup>b</sup>              | 36.5 <sup>c</sup>               |
| NH <sub>2</sub> NH <sup>-</sup>                  | 223.92 <sup>b</sup>             | 225.2 <sup>c</sup>              |
| NH <sub>2</sub> CH <sub>2</sub> <sup>-</sup>     | 196.11 <sup>b</sup>             | 193.4 <sup>c</sup>              |

<sup>a</sup> The values were taken from Ref<sup>5</sup>. <sup>b</sup> The values were predicted by protonation reactions:  $\text{NH}_2\text{O}^- + \text{H}^+ = \text{NH}_2\text{OH}$ ,  $\text{NH}_2\text{NH}^- + \text{H}^+ = \text{NH}_2\text{NH}_2$ ,  $\text{NH}_2\text{CH}_2^- + \text{H}^+ = \text{NH}_2\text{CH}_3$ ,  $1,2,4\text{-triazolide} + \text{H}^+ = 1,2,4\text{-triazole}$ . <sup>c</sup> The values were taken from Ref<sup>6</sup>.

**Table S3.** The HOFs ( $\text{kJ mol}^{-1}$ ) of cage anions, ammonium-based cation, and their salts and lattice energies of these salts

| Salts | $\Delta H_f^\circ$ (cation) | $\Delta H_f^\circ$ (anion) | Lattice energy | $\Delta H_f^\circ$ (salt)    |
|-------|-----------------------------|----------------------------|----------------|------------------------------|
| A1    | 678.80                      | 258.95                     | 1338.87        | 277.69                       |
| A2    | 678.80                      | 261.65                     | 1317.99        | 301.26                       |
| A3    | 678.80                      | 344.77                     | 1294.99        | 407.39                       |
| A4    | 678.80                      | 431.29                     | 1300.50        | 488.40                       |
| A5    | 678.80                      | 301.91                     | 1285.45        | 374.06                       |
| A6    | 678.80                      | 279.11                     | 1140.78        | 495.93                       |
| A7    | 678.80                      | 282.31                     | 1129.78        | 510.13                       |
| A8    | 678.80                      | 366.48                     | 1112.20        | 611.88                       |
| A9    | 678.80                      | 464.94                     | 1119.14        | 703.40                       |
| A10   | 678.80                      | 376.16                     | 1106.56        | 627.20                       |
| B1    | 678.80                      | 110.71                     | 1304.25        | 164.06 (213) <sup>a</sup>    |
| B2    | 678.80                      | 82.48                      | 1282.98        | 157.10                       |
| B3    | 678.80                      | 158.59                     | 1264.41        | 251.78                       |
| B4    | 678.80                      | 262.29                     | 1276.13        | 343.76                       |
| B5    | 678.80                      | 153.54                     | 1256.37        | 254.77                       |
| B6    | 678.80                      | 148.22                     | 1125.68        | 380.13 (358.61) <sup>b</sup> |
| B7    | 678.80                      | 126.47                     | 1110.35        | 373.72                       |
| B8    | 678.80                      | 210.63                     | 1095.96        | 472.27                       |
| B9    | 678.80                      | 312.36                     | 1101.29        | 568.67                       |
| B10   | 678.80                      | 237.38                     | 1097.89        | 497.09                       |
| C1    | 678.80                      | 288.21                     | 1223.49        | 422.31 (535) <sup>c</sup>    |
| C2    | 678.80                      | 263.28                     | 1205.47        | 415.41                       |
| C3    | 678.80                      | 362.19                     | 1179.92        | 539.87                       |
| C4    | 678.80                      | 512.60                     | 1179.85        | 690.35                       |
| C5    | 678.80                      | 376.81                     | 1178.78        | 555.63                       |
| C6    | 678.80                      | 348.34                     | 1058.01        | 647.93                       |
| C7    | 678.80                      | 463.48                     | 1049.23        | 771.85                       |
| C8    | 678.80                      | 408.72                     | 1045.97        | 720.35                       |
| C9    | 678.80                      | 554.25                     | 1042.70        | 869.15                       |
| C10   | 678.80                      | 448.45                     | 1037.82        | 768.22                       |
| D1    | 678.80                      | -30.40                     | 1144.01        | 183.18 (360) <sup>d</sup>    |
| D2    | 678.80                      | -51.50                     | 1127.06        | 179.03                       |
| D3    | 678.80                      | 35.25                      | 1113.04        | 279.81                       |
| D4    | 678.80                      | 175.93                     | 1118.36        | 415.17                       |
| D5    | 678.80                      | 98.03                      | 1111.43        | 344.20                       |
| D6    | 678.80                      | 40.85                      | 1022.38        | 376.07                       |

|     |        |        |         |        |
|-----|--------|--------|---------|--------|
| D7  | 678.80 | 39.46  | 1006.09 | 390.97 |
| D8  | 678.80 | 104.95 | 997.44  | 465.11 |
| D9  | 678.80 | 251.09 | 996.56  | 612.13 |
| D10 | 678.80 | 174.03 | 1001.92 | 529.71 |

<sup>a</sup>The value is from Ref<sup>2</sup>; <sup>b</sup> At the B3LYP/aug-cc-pVTZ level; <sup>c</sup> The value is from Ref<sup>3</sup>; <sup>d</sup> The value is from Ref<sup>4</sup>.

**Table S4.** Predicted entropies ( $S_{salt}$ ), entropies of reaction ( $\Delta S_{rxn}$ ), enthalpies of reaction ( $\Delta H_{rxn}$ ), and free energies of reaction ( $\Delta G_{rxn}$ ) of the salts.

| Anion | $S_{salts}$ | $\Delta S_{rxn}$ | $\Delta H_{rxn}$ | $\Delta G_{rxn}$ |
|-------|-------------|------------------|------------------|------------------|
| A1    | 276.19      | -691.82          | -432.22          | -226.06          |
| A2    | 285.54      | -693.82          | -377.04          | -170.28          |
| A3    | 296.46      | -731.87          | -400.48          | -182.39          |
| A4    | 293.78      | -708.75          | -437.10          | -225.89          |
| A5    | 301.19      | -715.84          | -429.20          | -215.88          |
| A6    | 391.20      | -860.75          | -309.18          | -52.68           |
| A7    | 399.75      | -872.18          | -263.69          | -3.78            |
| A8    | 414.02      | -885.93          | -279.08          | -15.08           |
| A9    | 408.29      | -880.03          | -318.55          | -56.30           |
| A10   | 418.77      | -881.39          | -317.63          | -54.97           |
| B1    | 291.98      | -695.01          | -464.75          | -257.63          |
| B2    | 302.44      | -715.09          | -438.67          | -225.57          |
| B3    | 312.09      | -761.65          | -466.74          | -239.77          |
| B4    | 305.94      | -742.85          | -494.29          | -272.92          |
| B5    | 316.42      | -751.01          | -485.64          | -261.84          |
| B6    | 403.00      | -883.34          | -348.31          | -85.08           |
| B7    | 415.57      | -899.15          | -323.99          | -56.04           |
| B8    | 427.93      | -928.01          | -340.17          | -63.63           |
| B9    | 423.28      | -914.07          | -368.50          | -96.11           |
| B10   | 426.23      | -911.47          | -358.74          | -87.12           |
| C1    | 335.20      | -788.18          | -443.03          | -208.16          |
| C2    | 346.27      | -807.48          | -445.82          | -205.19          |
| C3    | 362.99      | -821.64          | -415.18          | -170.33          |
| C4    | 363.04      | -792.74          | -433.93          | -197.69          |
| C5    | 363.76      | -828.79          | -452.83          | -205.85          |
| C6    | 463.35      | -959.30          | -319.71          | -33.83           |
| C7    | 472.18      | -965.13          | -334.90          | -47.29           |
| C8    | 475.53      | -986.16          | -322.10          | -28.23           |
| C9    | 478.91      | -983.29          | -337.52          | -44.50           |
| C10   | 484.04      | -996.58          | -339.82          | -42.83           |
| D1    | 388.74      | -868.05          | -428.31          | -169.63          |
| D2    | 401.90      | -873.65          | -441.33          | -180.98          |
| D3    | 413.32      | -919.82          | -462.59          | -188.49          |
| D4    | 408.93      | -898.29          | -441.32          | -173.63          |
| D5    | 414.67      | -915.87          | -435.54          | -162.61          |

|     |        |          |         |        |
|-----|--------|----------|---------|--------|
| D6  | 500.83 | -1033.40 | -347.35 | -39.40 |
| D7  | 517.25 | -1056.83 | -351.61 | -36.68 |
| D8  | 529.85 | -1069.37 | -351.33 | -32.65 |
| D9  | 530.92 | -1067.02 | -342.02 | -24.05 |
| D10 | 524.45 | -1091.43 | -350.23 | -24.98 |

---

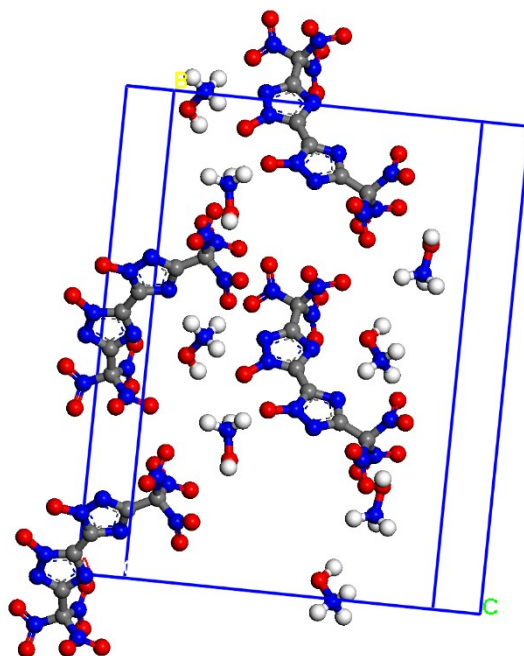

**Figure S1.** Optimized crystal structure of the **B6**

Anion A1

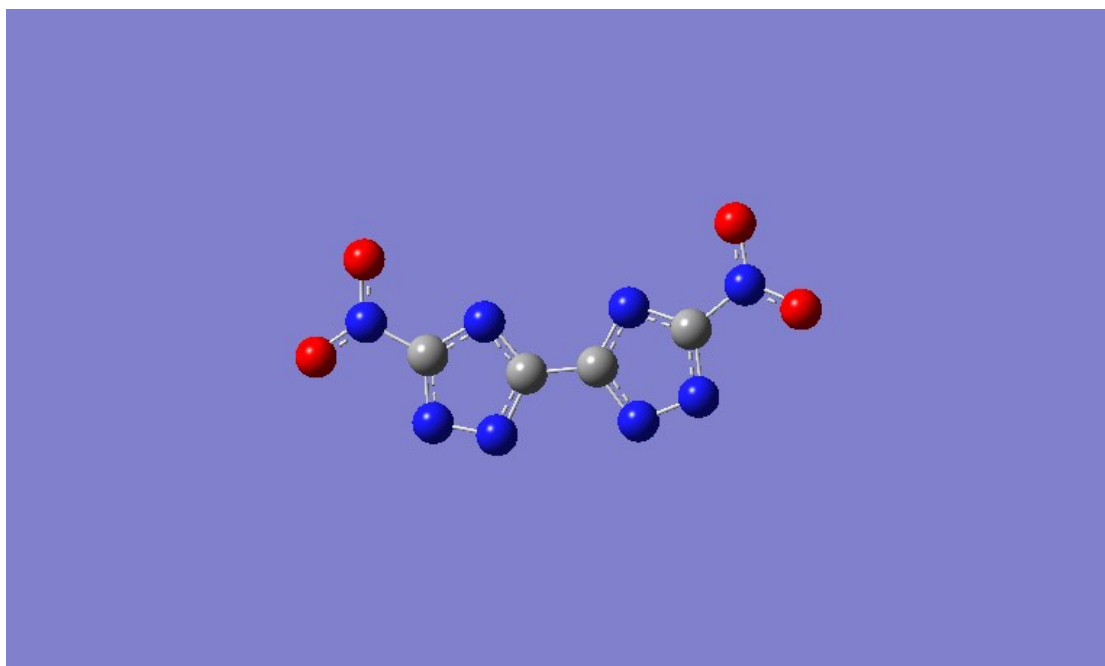

Anion A2

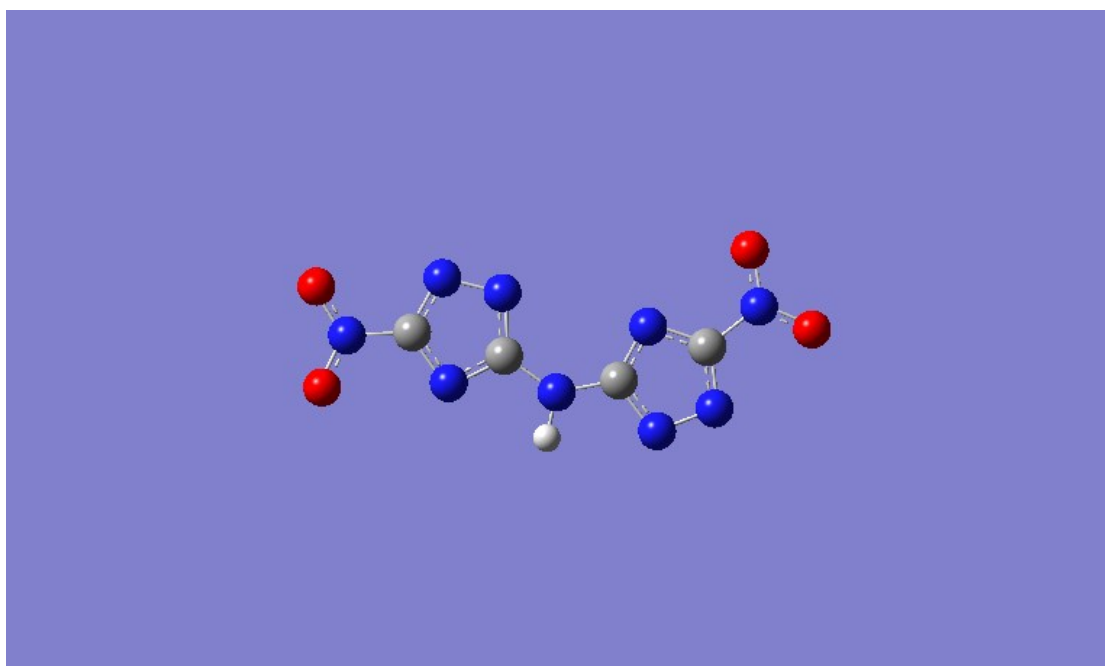

**Anion A3**

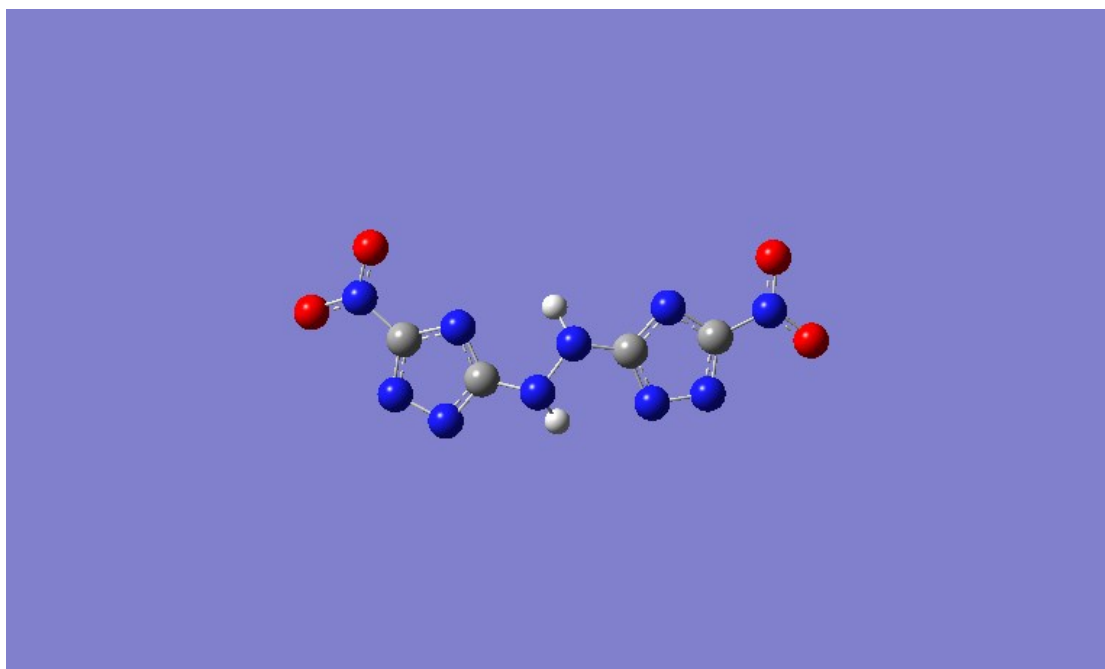

**Anion A4**

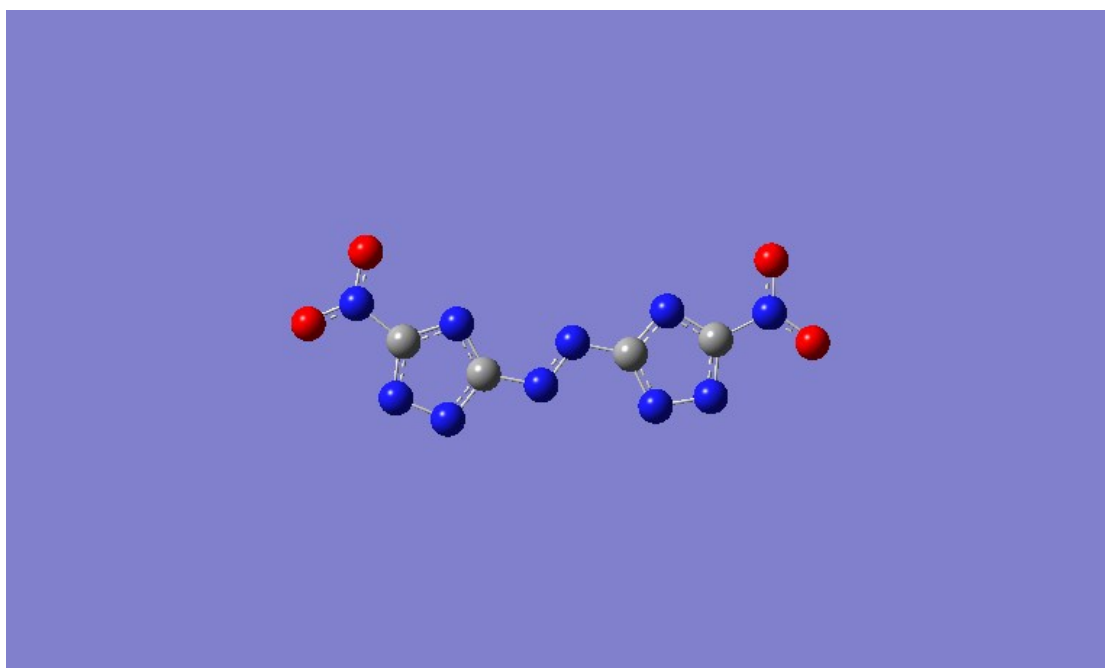



**Anion A5**

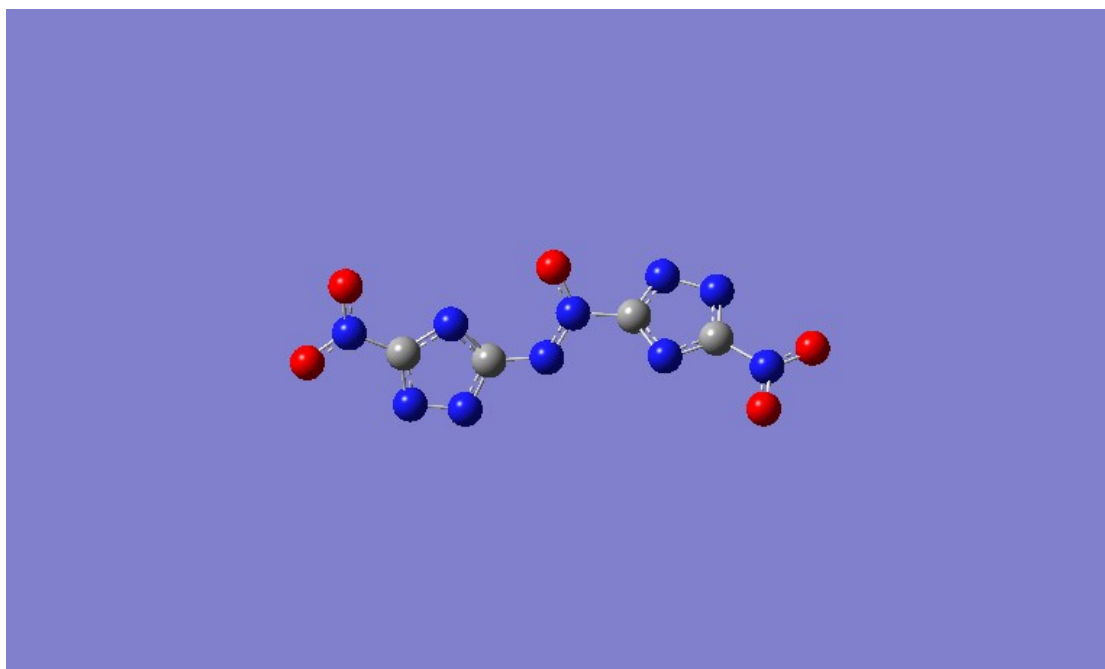

**Anion A6**

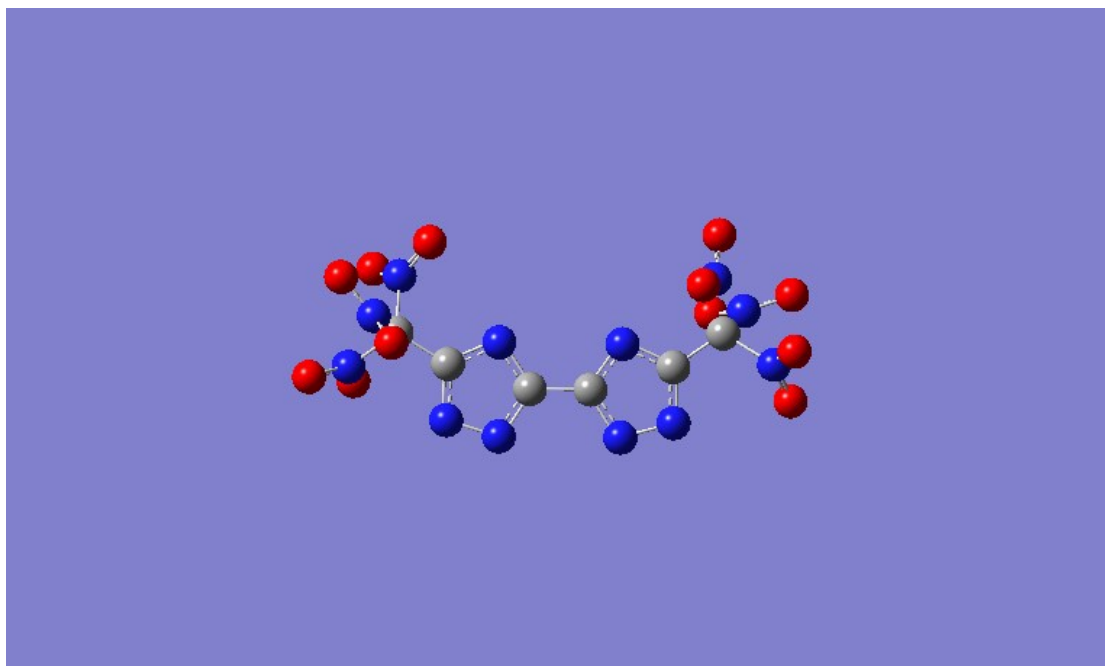

**Anion A7**

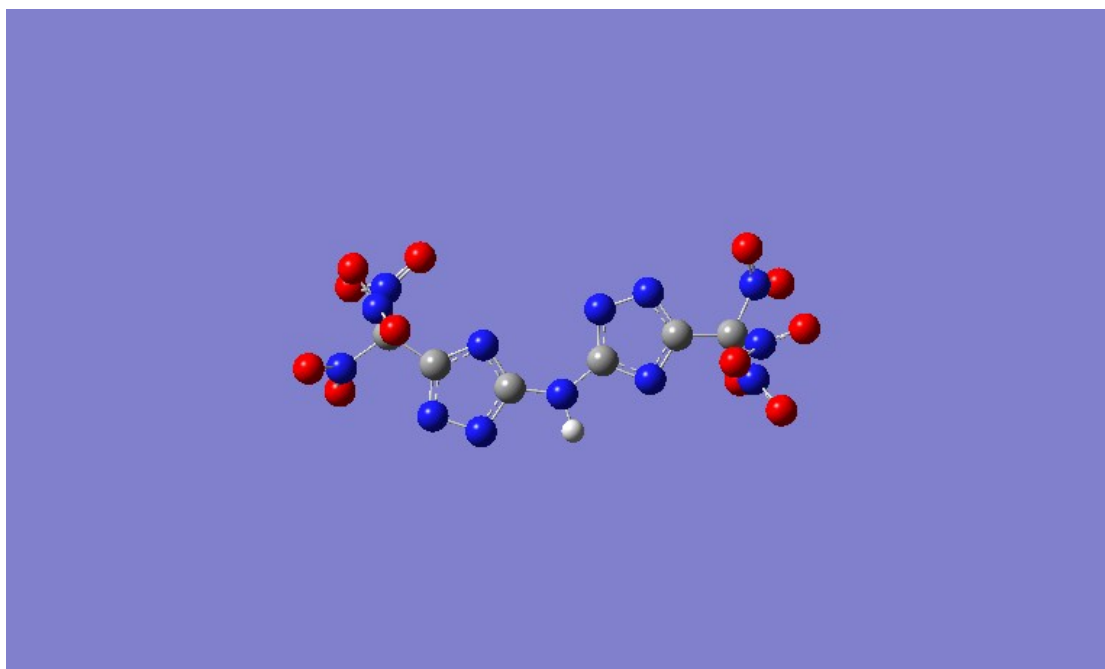

**Anion A8**

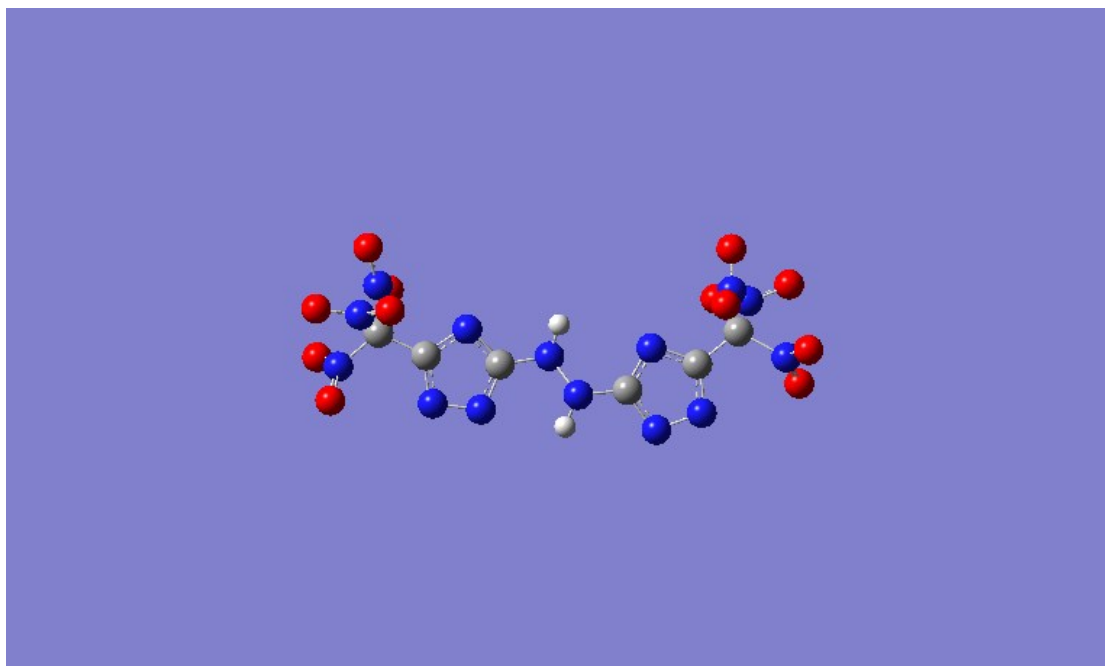

**Anion A9**

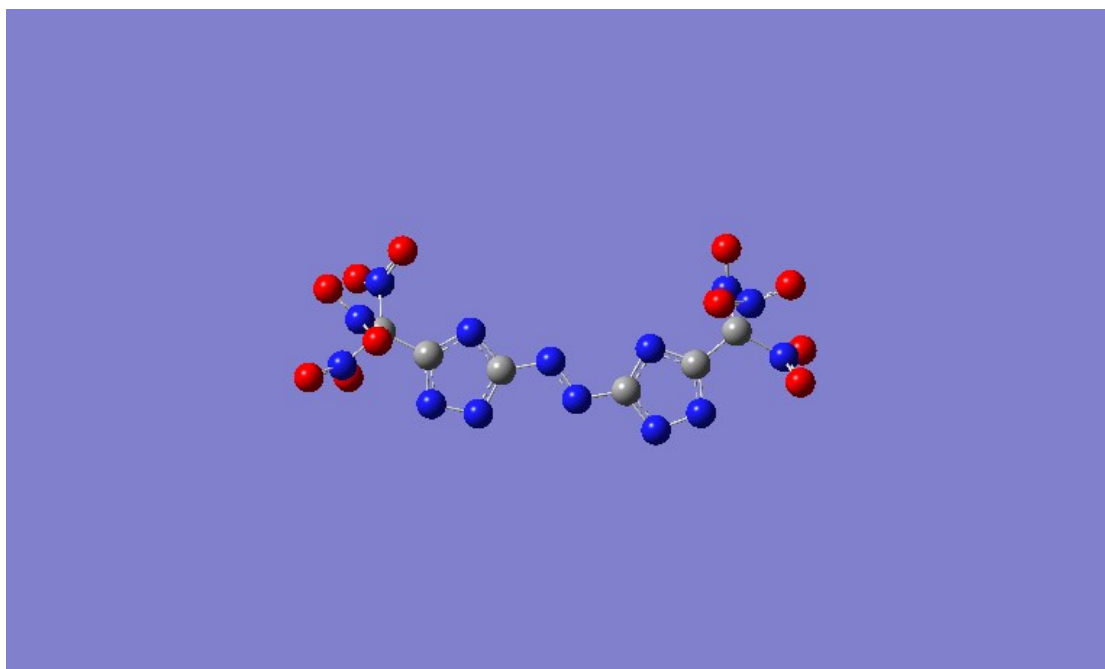

**Anion A10**

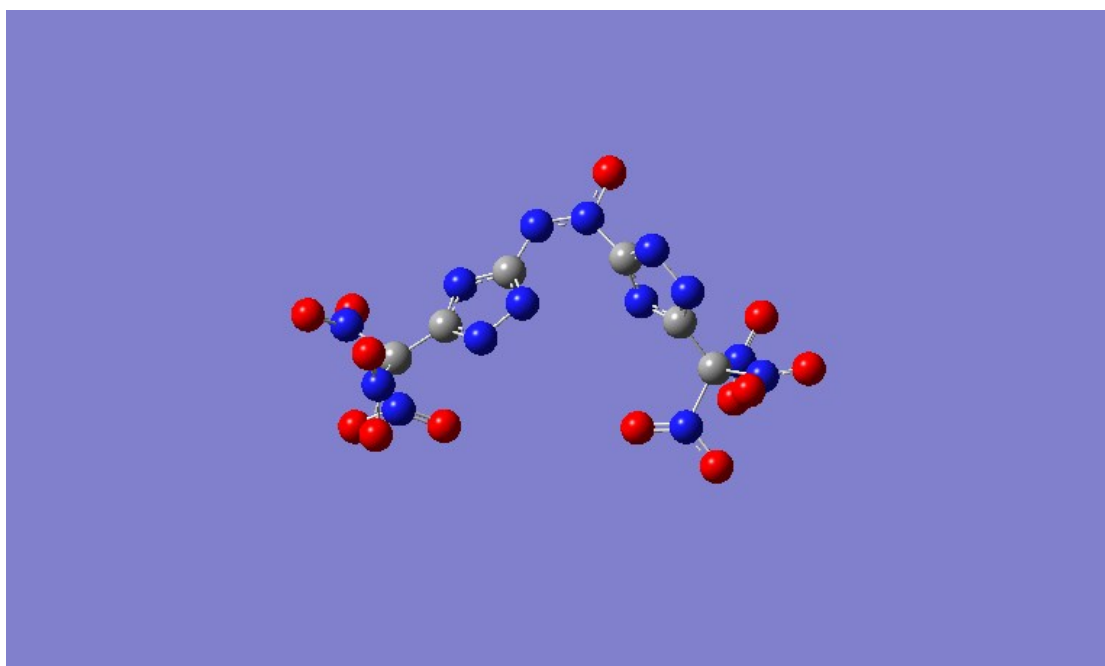

**Anion B1**

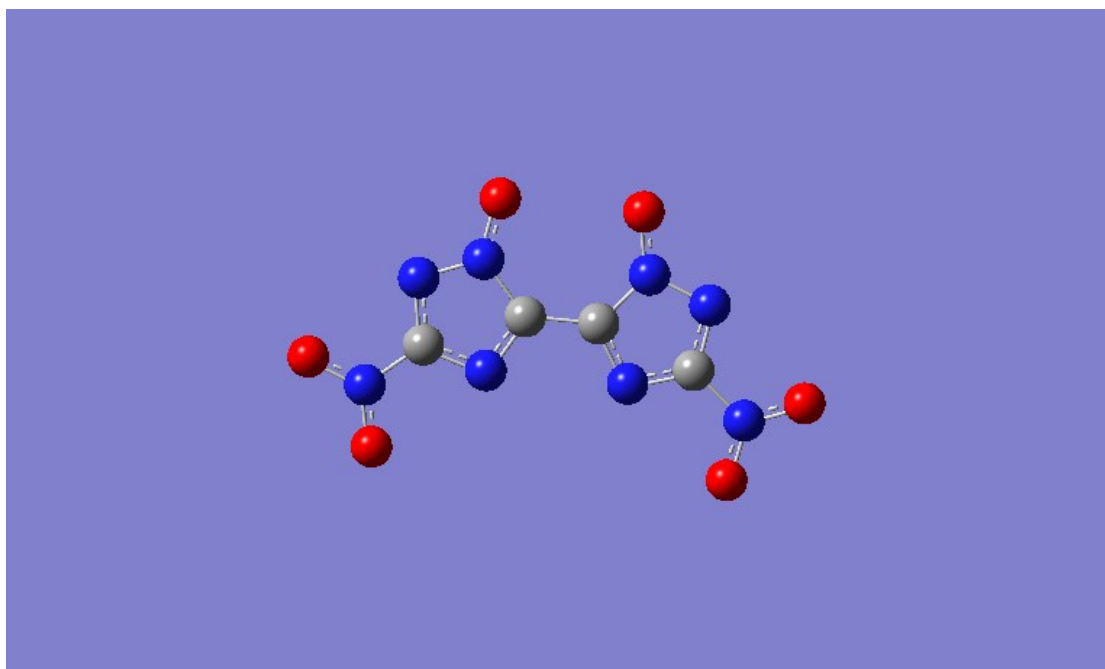

**Anion B2**

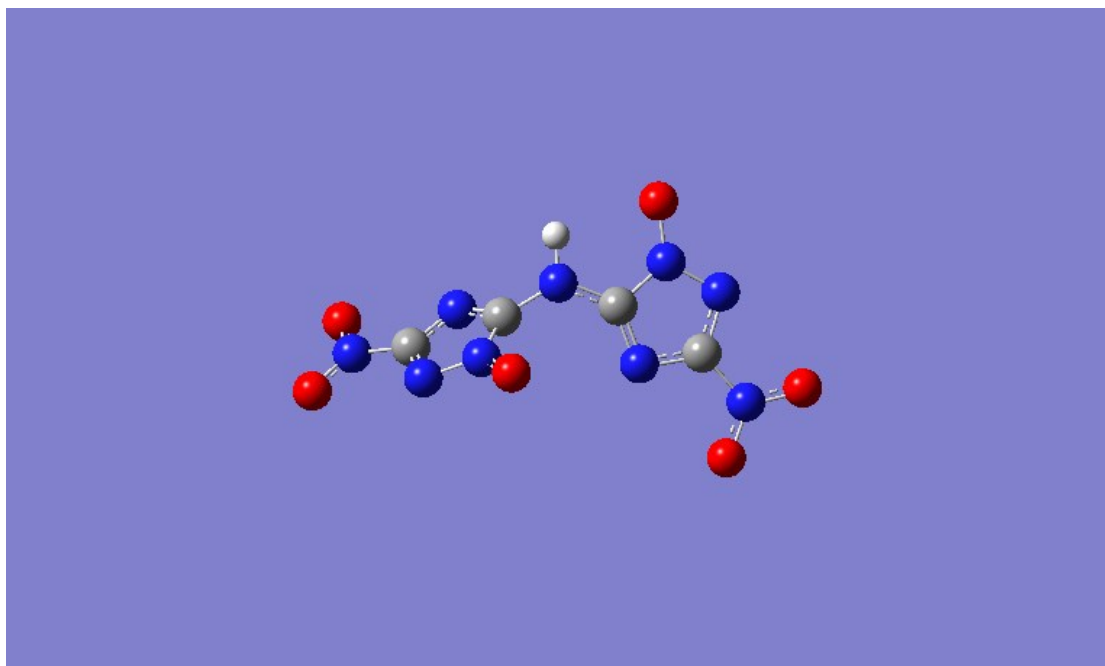

**Anion B3**

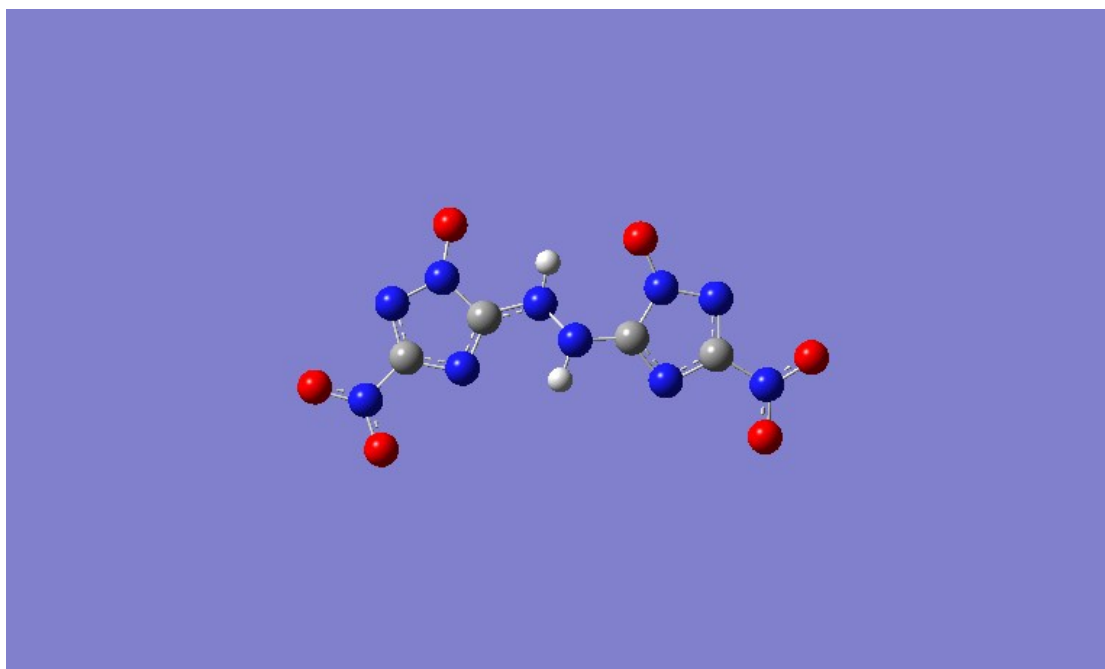

**Anion B4**

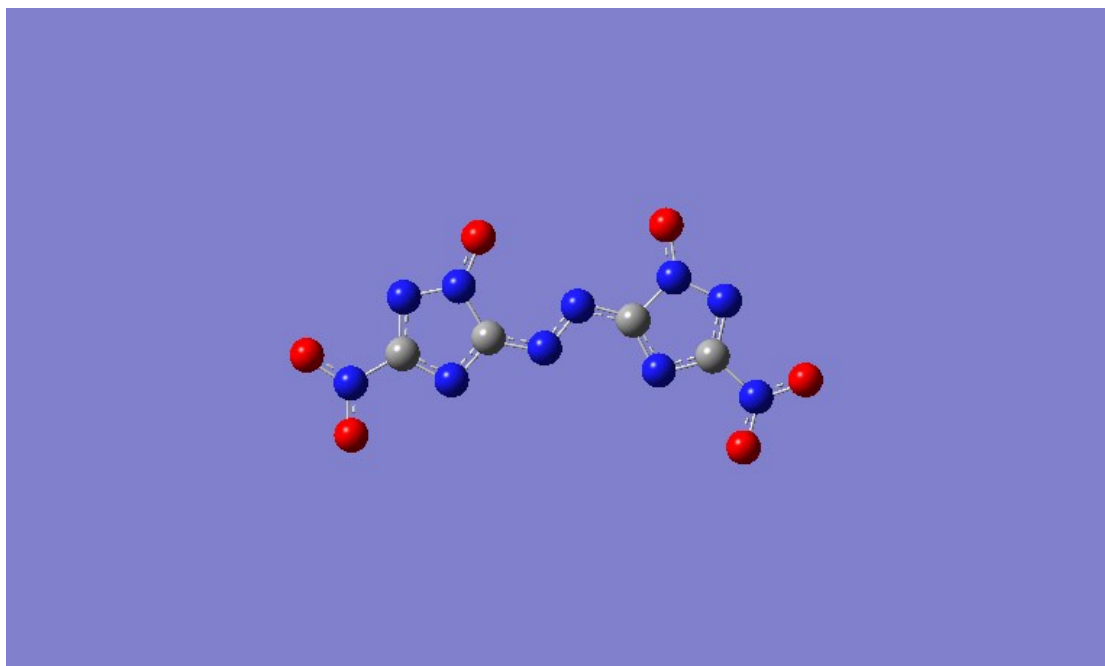

**Anion B5**

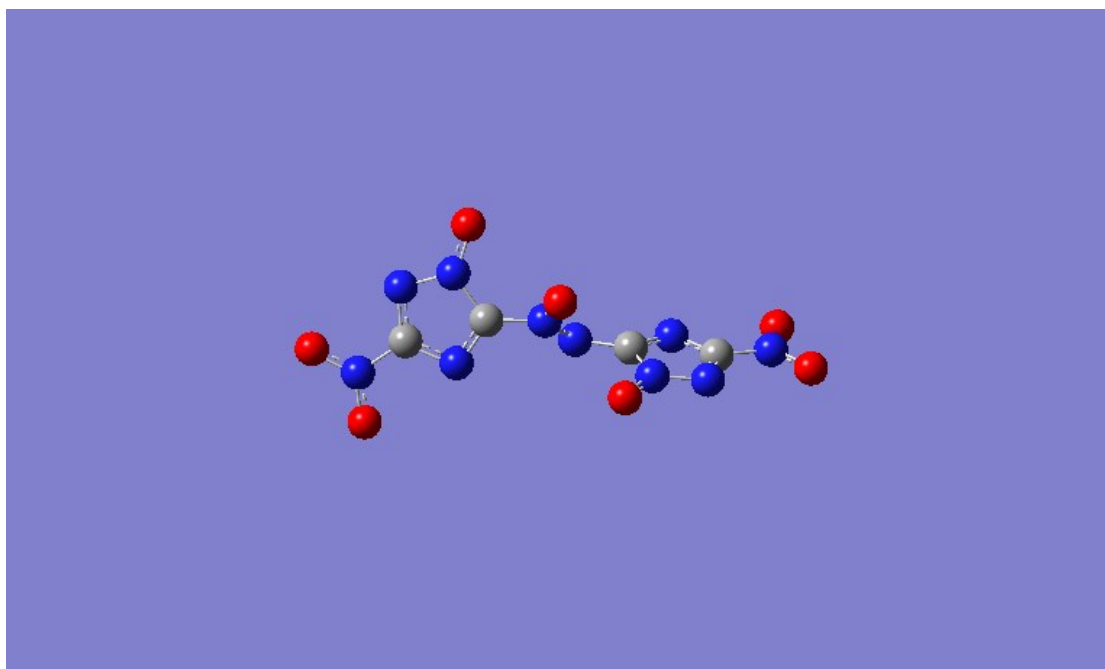

**Anion B6**

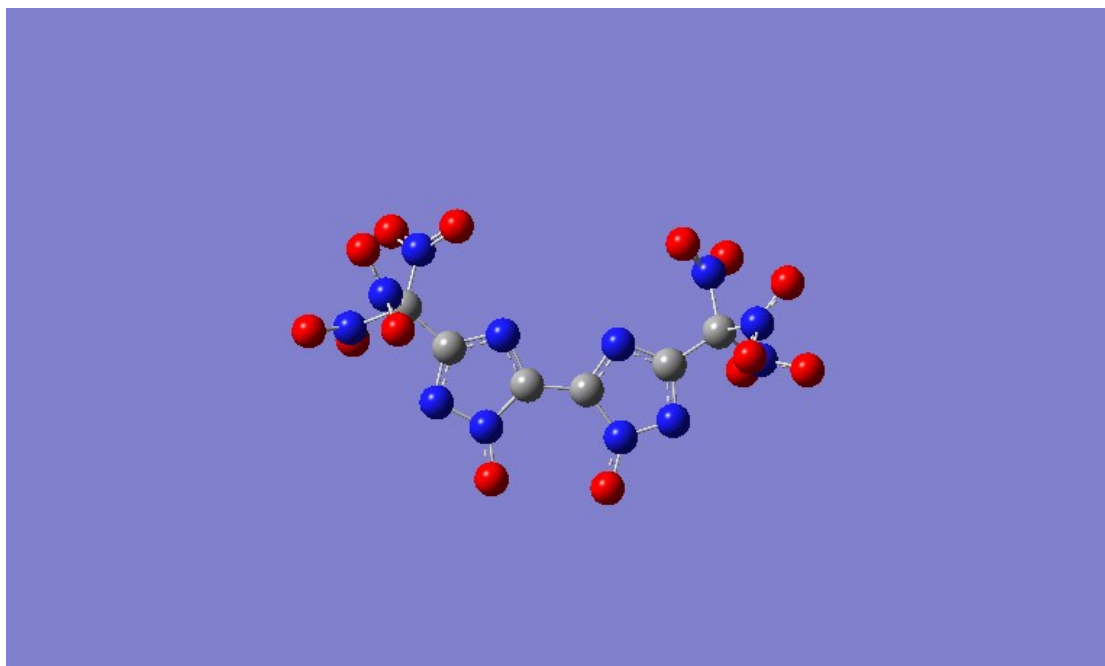

**Anion B7**

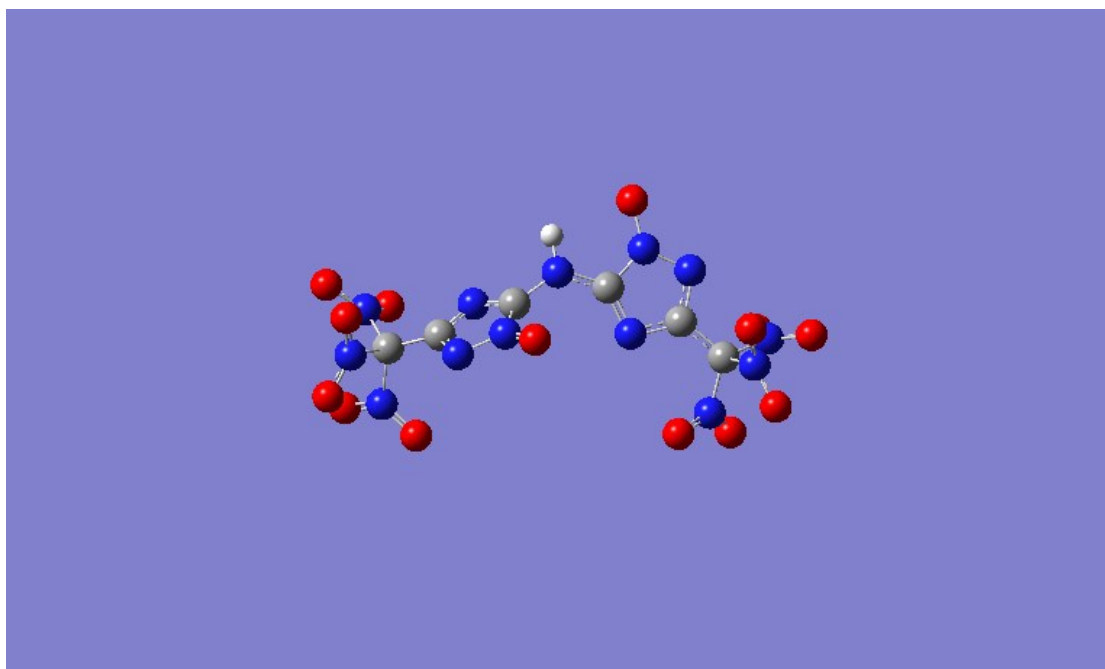

**Anion B8**

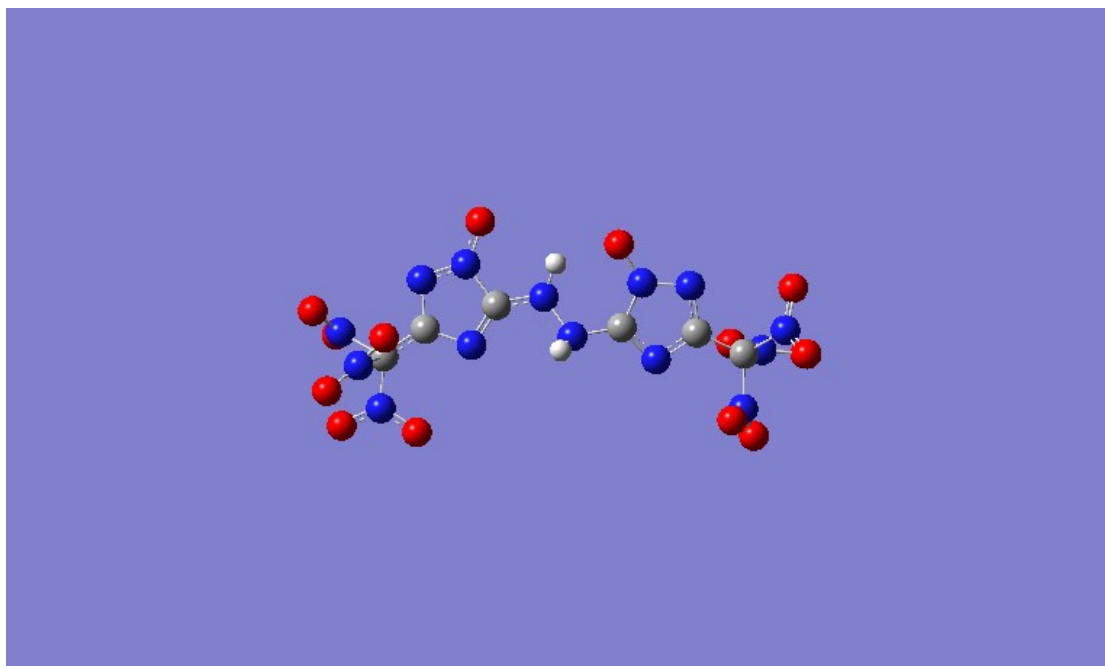

**Anion B9**

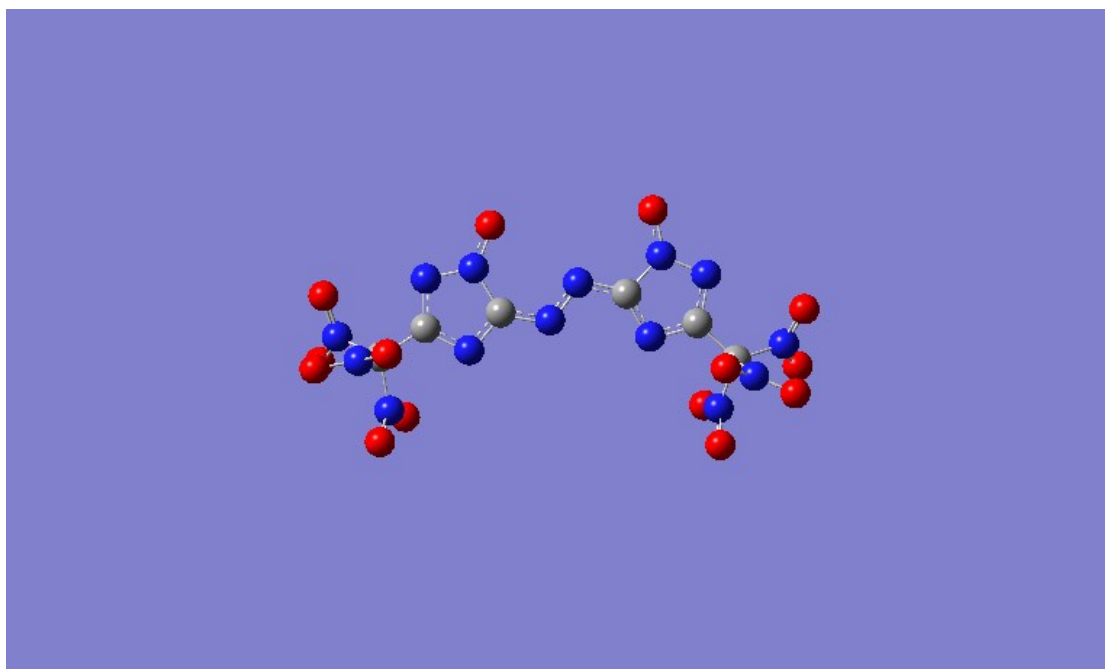

**Anion B10**

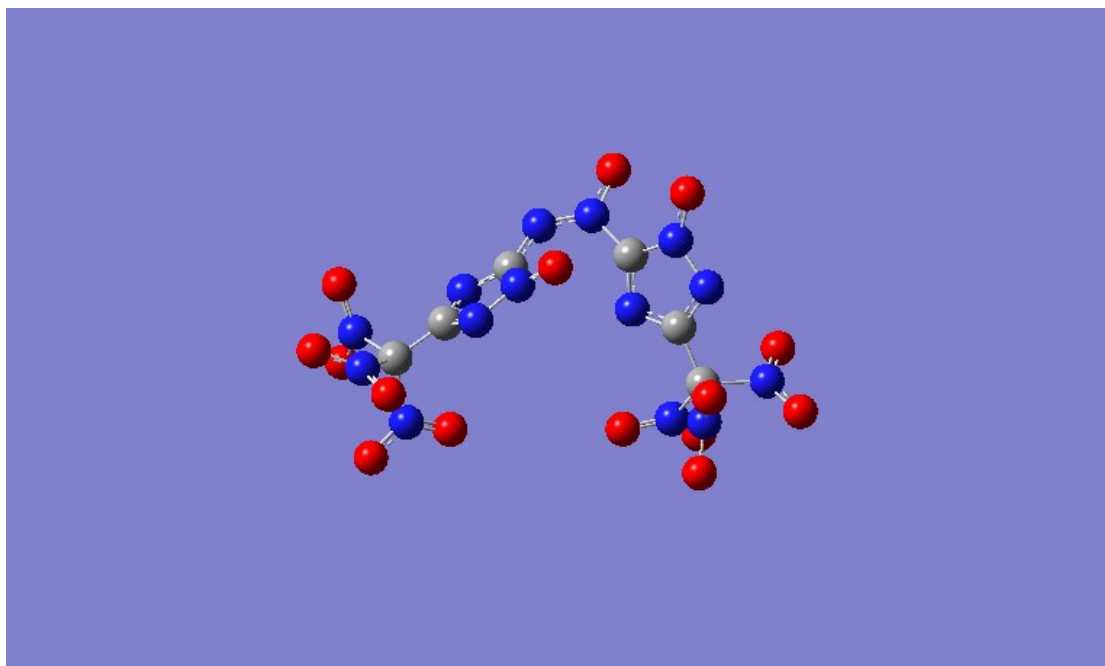



**Anion C1**

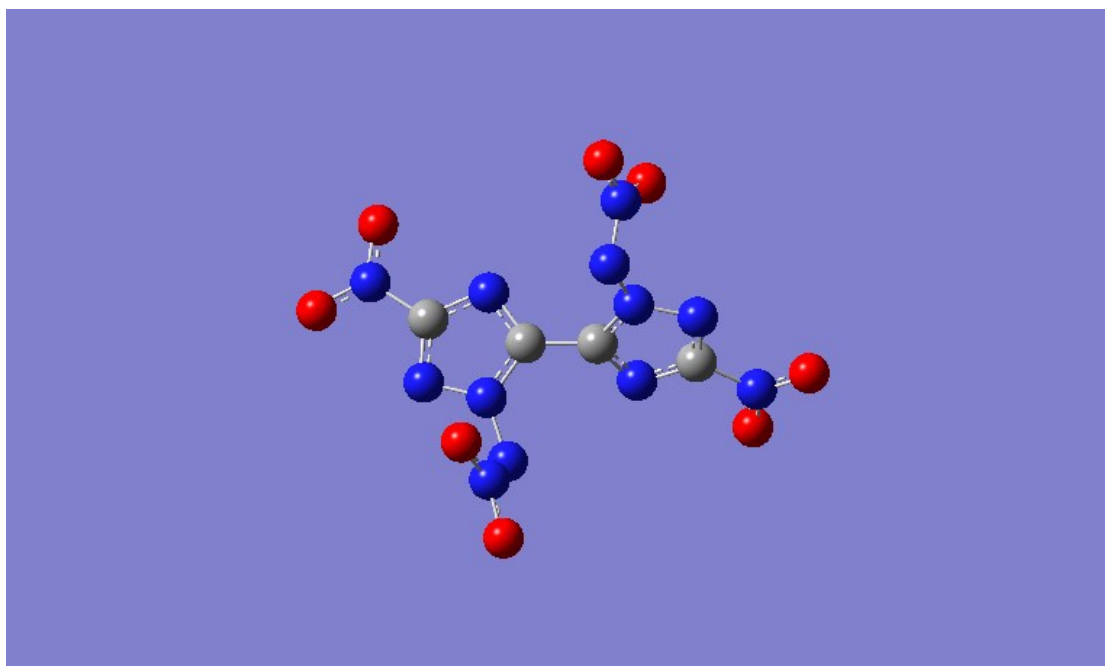

**Anion C2**

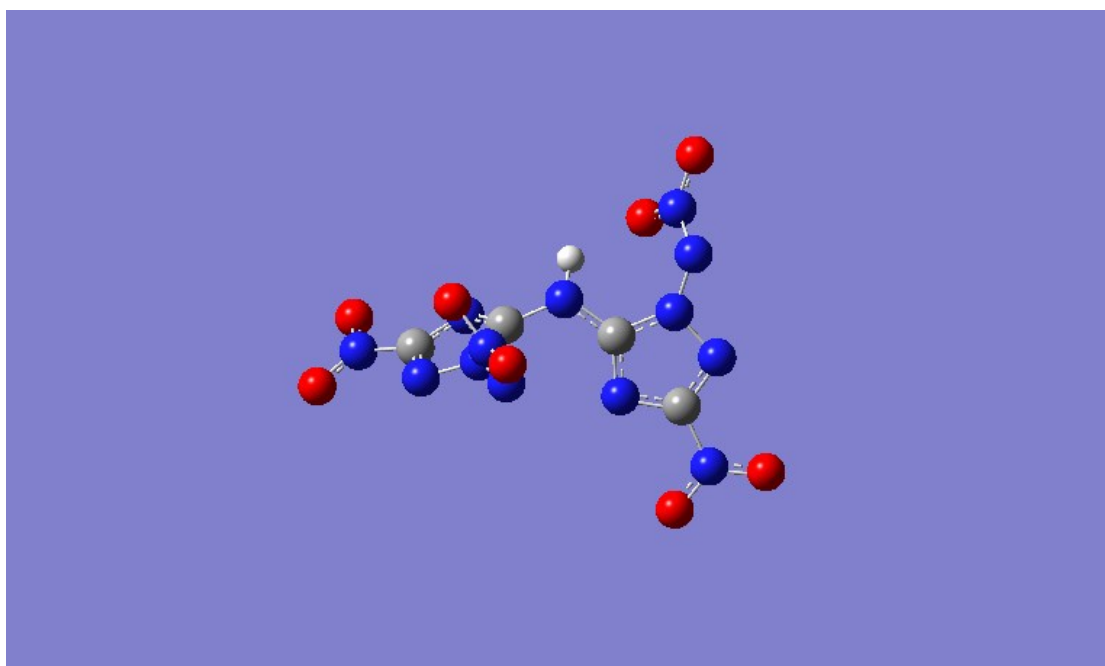

Anion C3

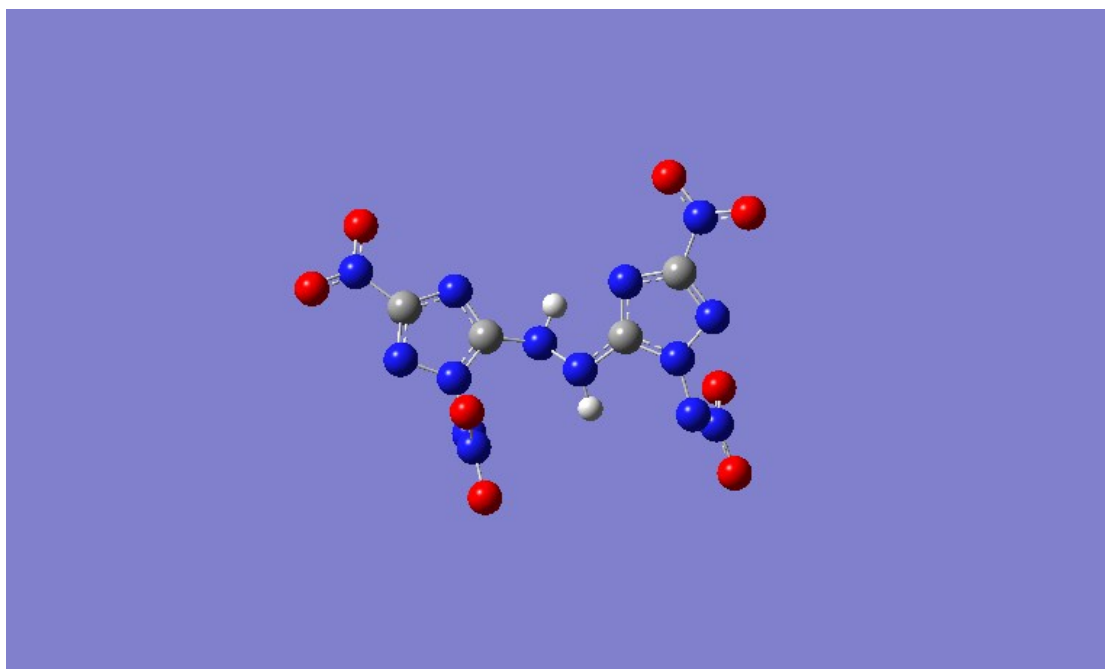

Anion C4

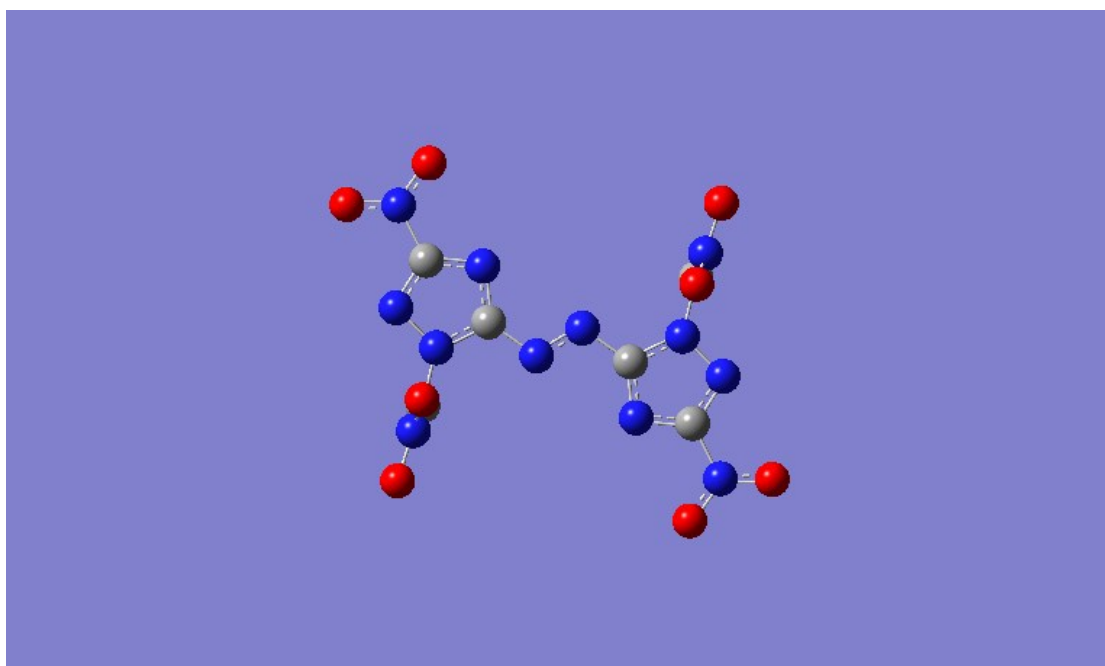

**Anion C5**

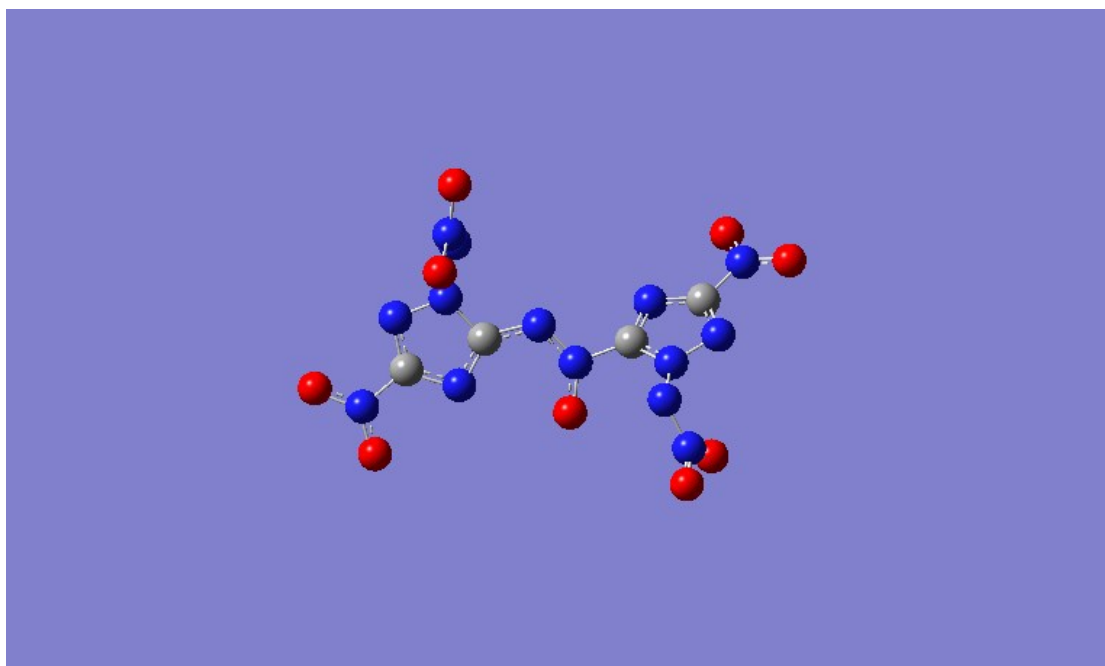

**Anion C6**

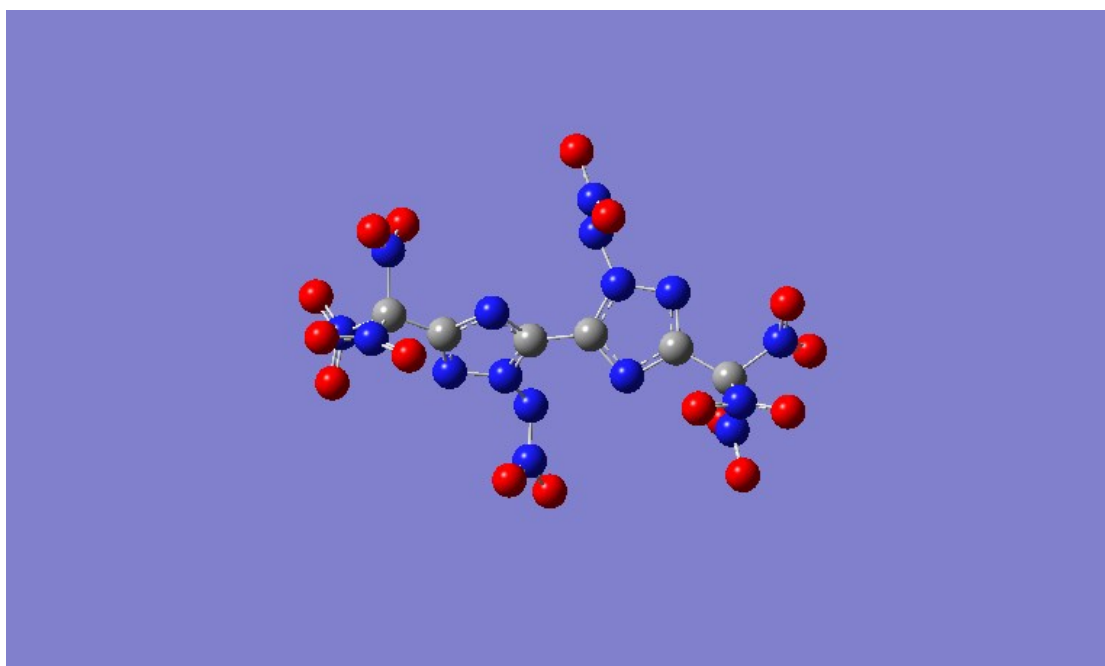

**Anion C7**

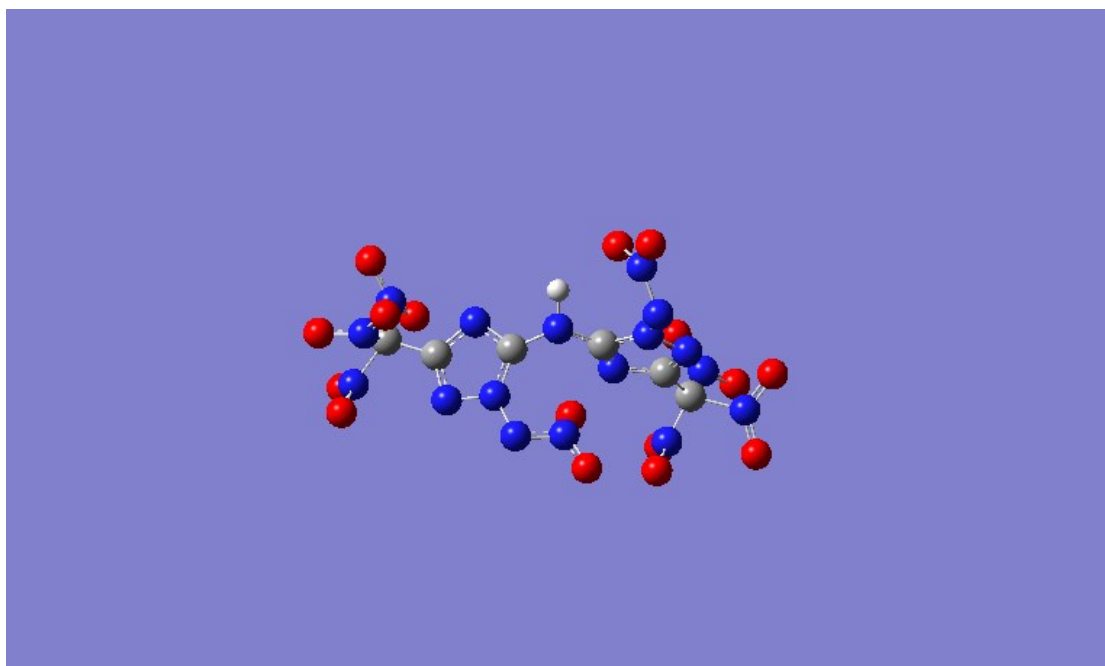

**Anion C8**

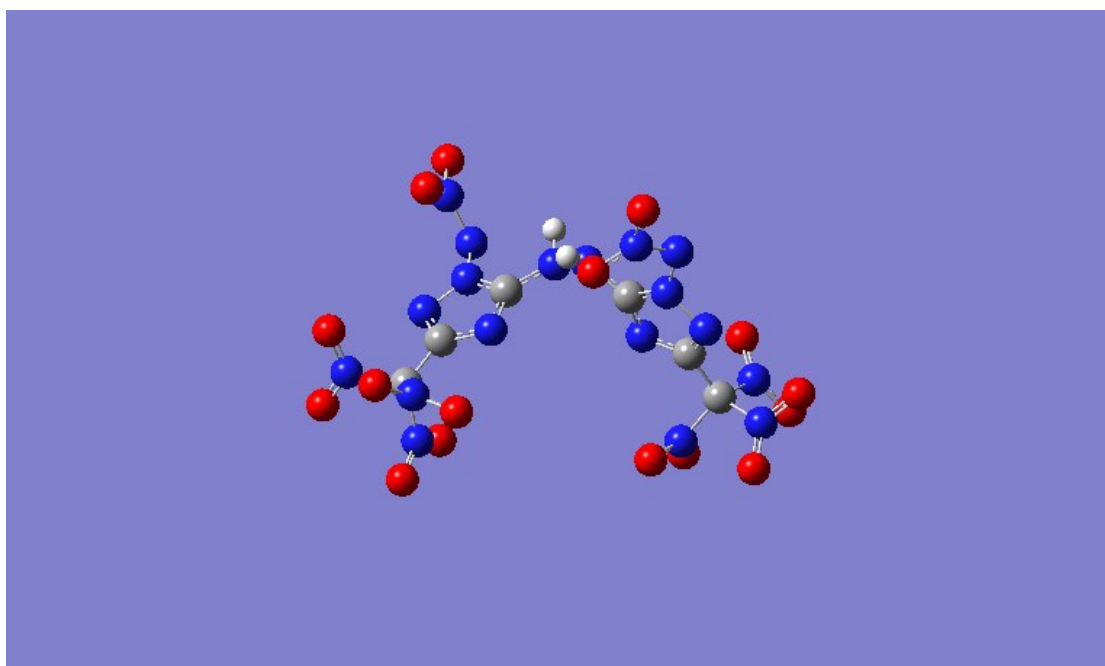

**Anion C9**

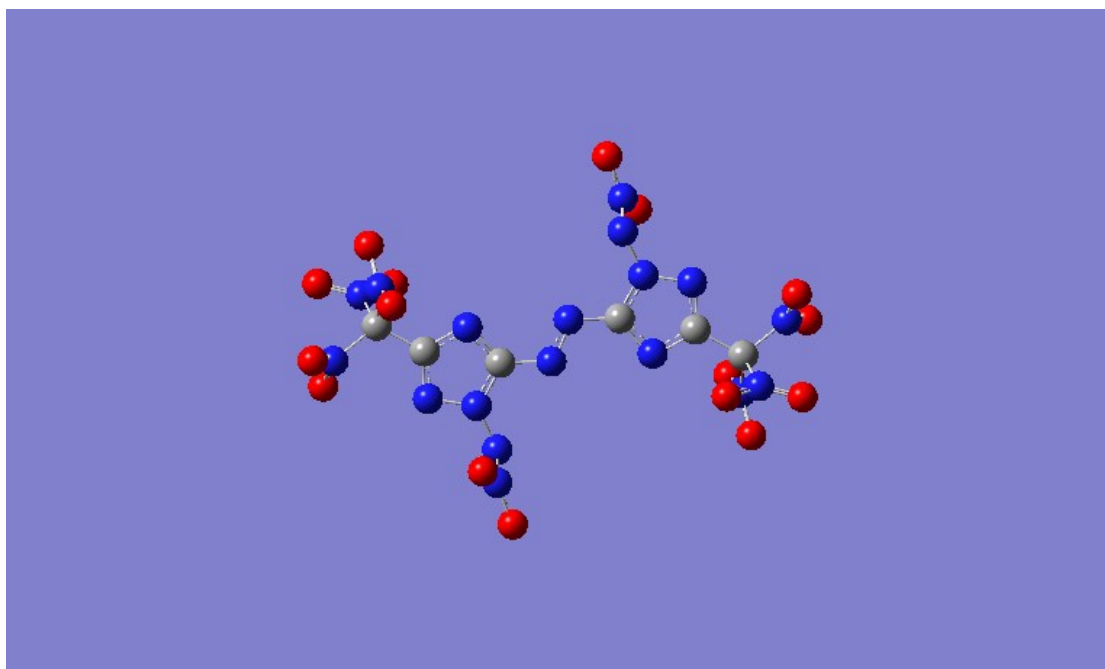

**Anion C10**

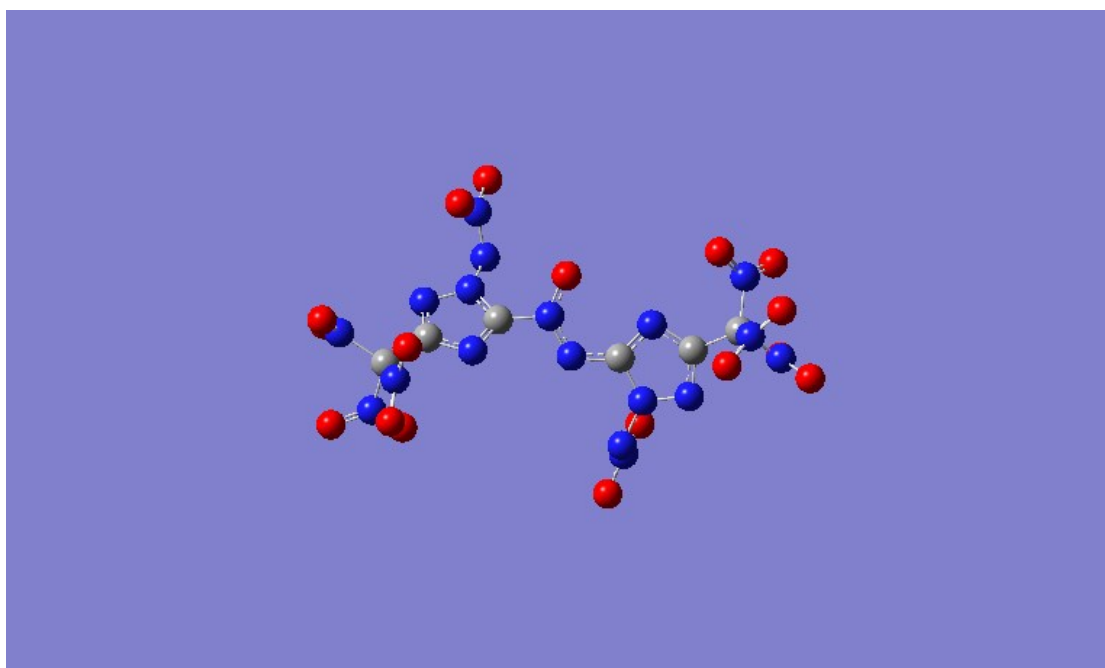

**Anion D1**

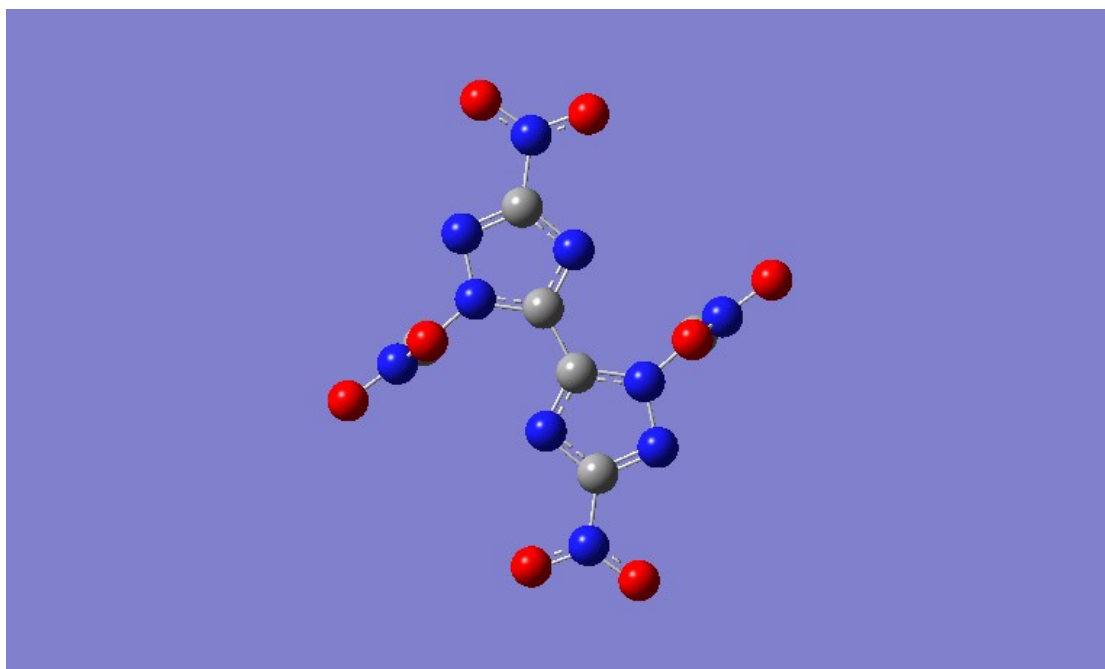

**Anion D2**

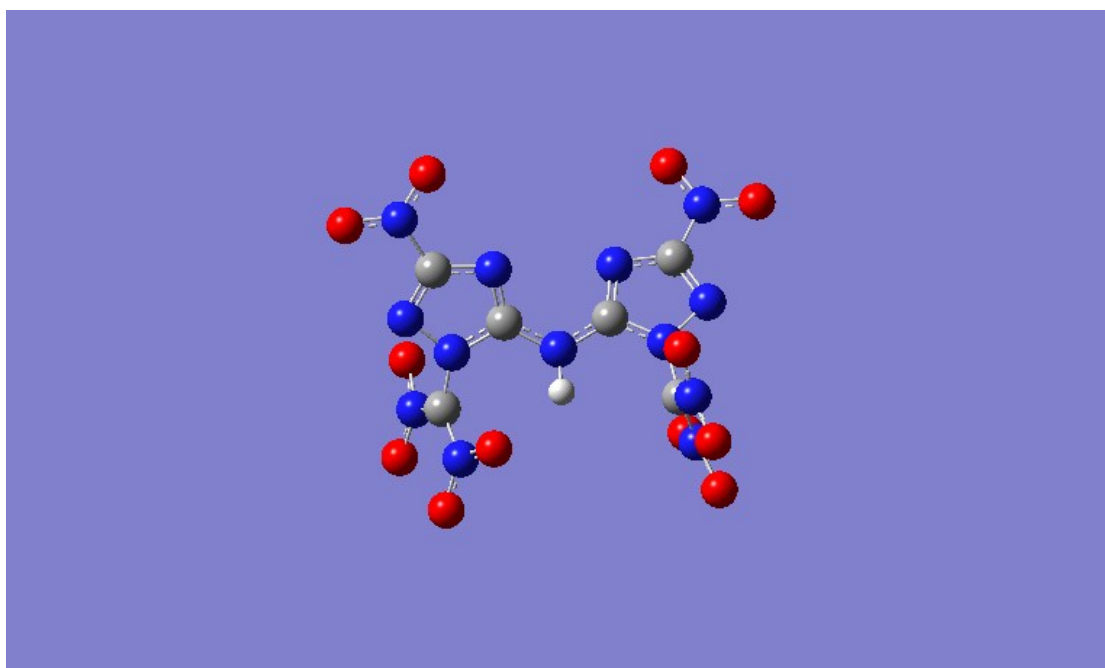

**Anion D3**

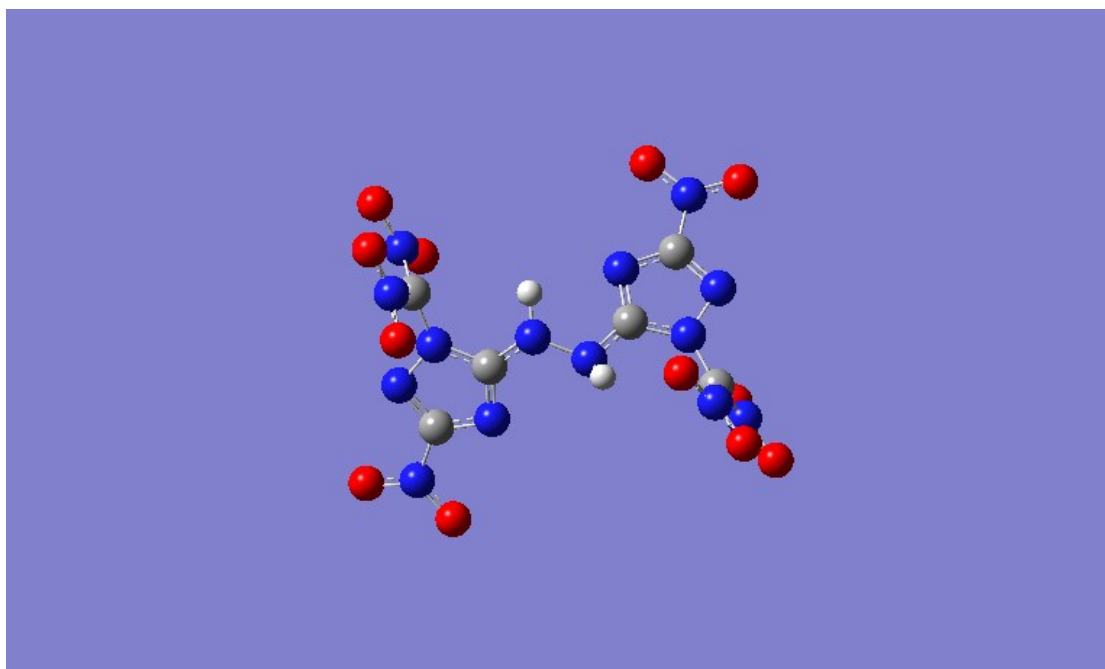

**Anion D4**

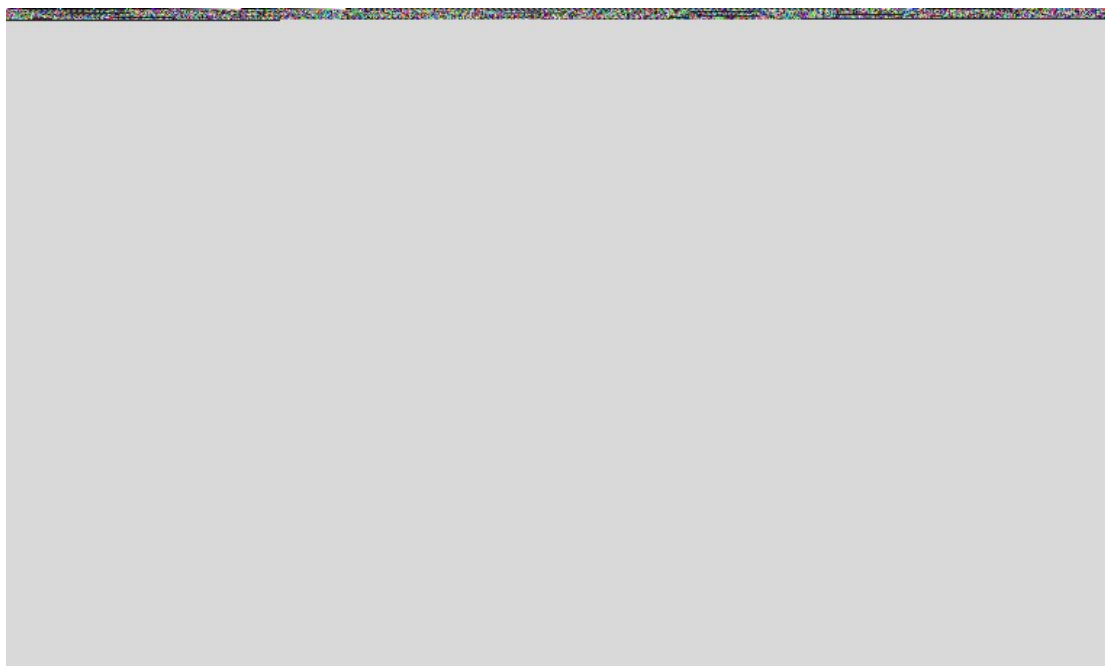

Anion D5

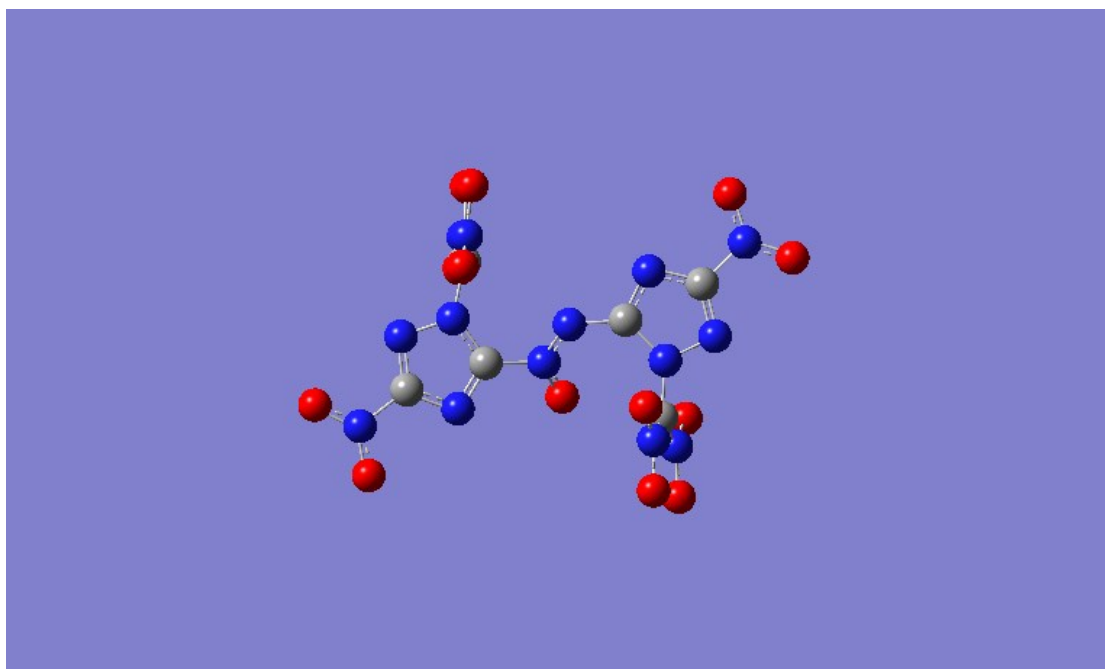

Anion D6

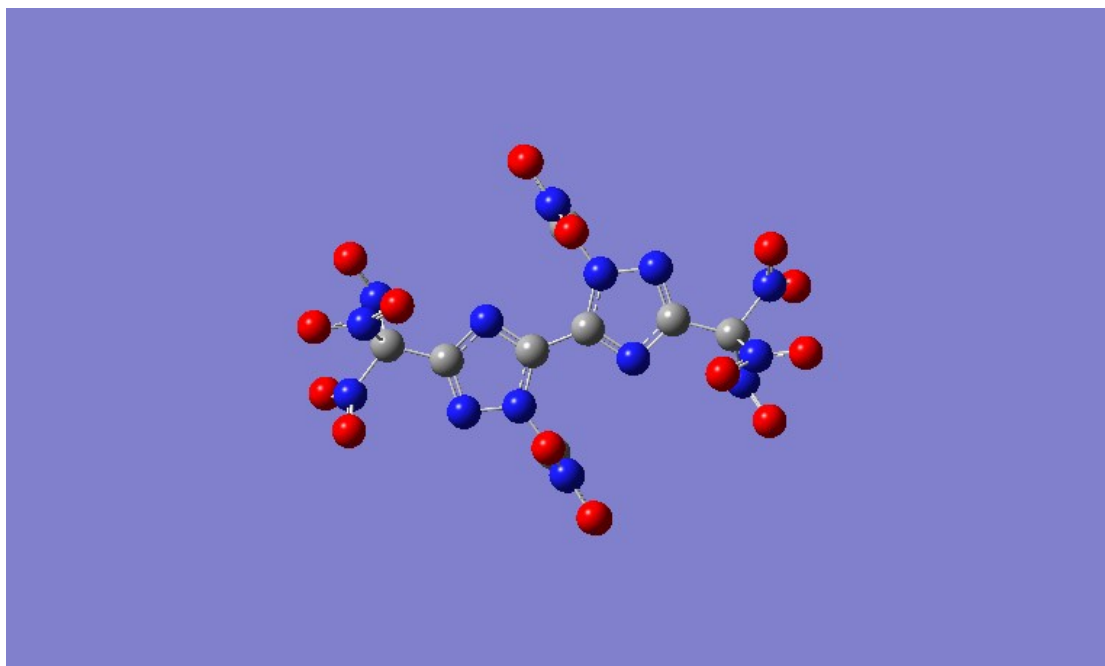



**Anion D7**

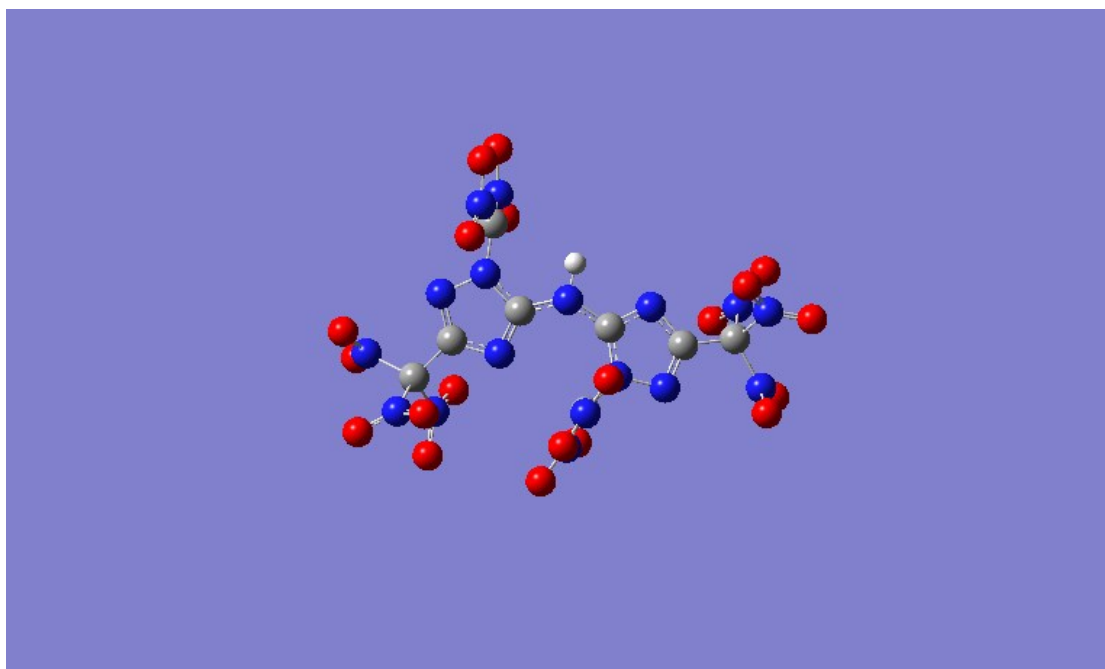

**Anion D8**

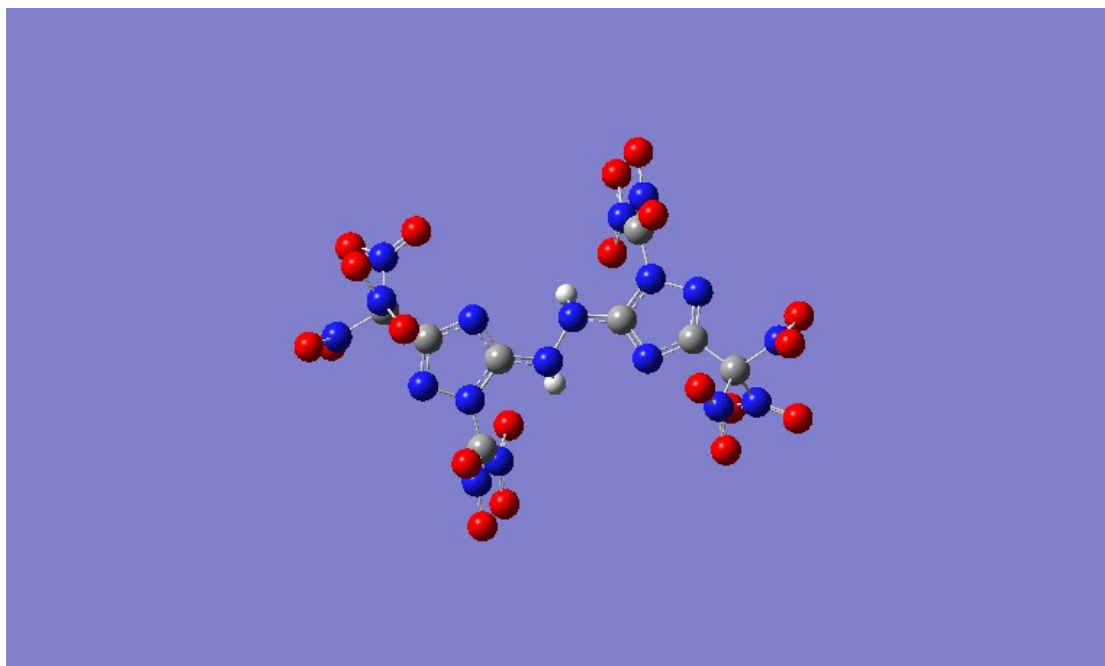

Anion D9

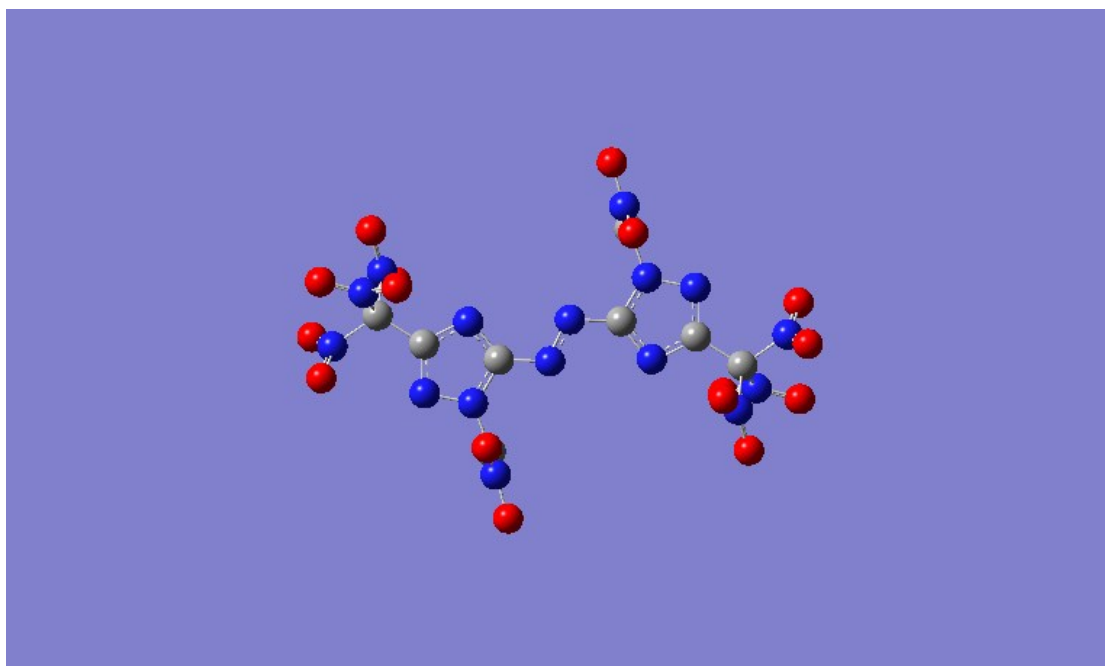

Anion D10

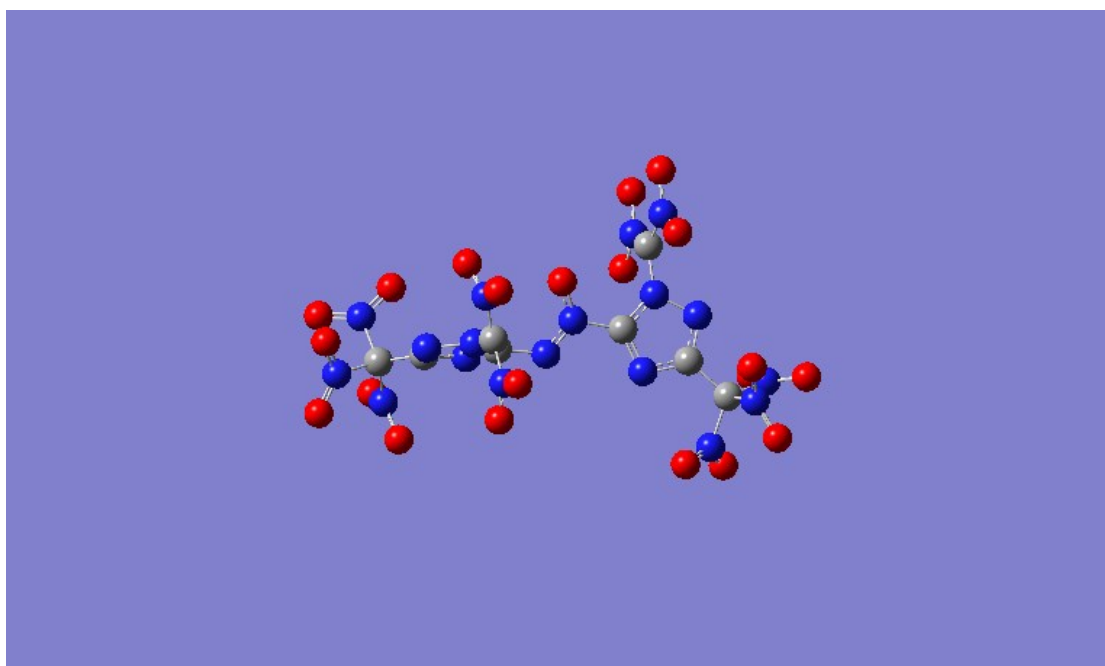

### Cation

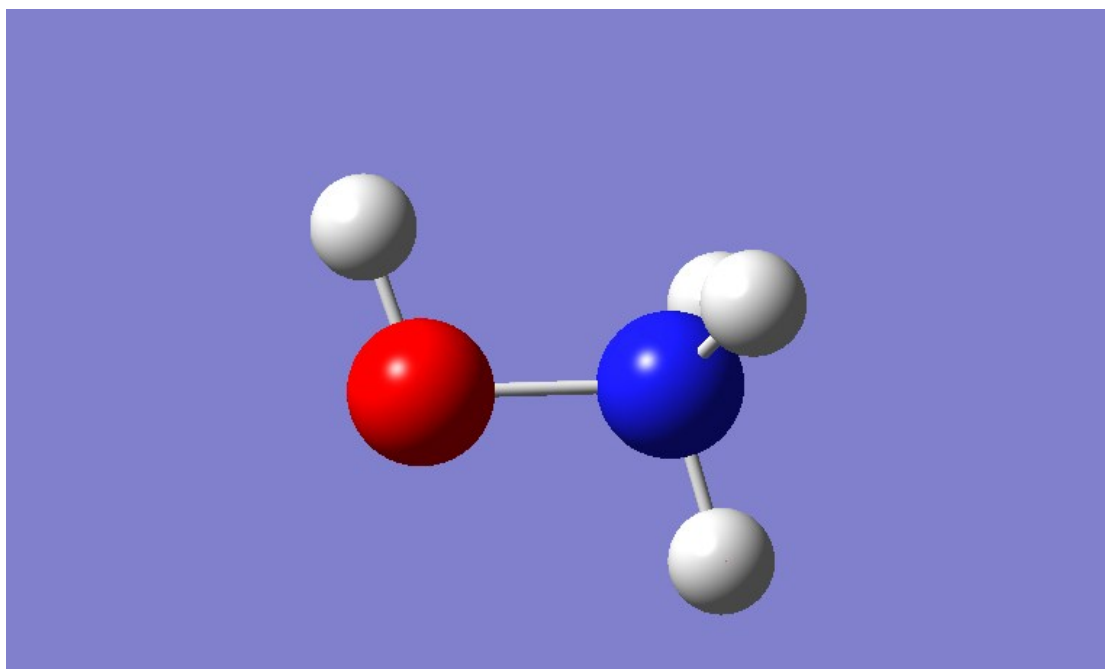

**Figure S1.** Optimized structures of the related anions and cation

#### References

1. Ma, Q.; Gu, H.; Huang, J.; Nie, F.; Fan, G.; Liao, L.; Yang, W., Formation of trinitromethyl functionalized 1,2,4-triazole-based energetic ionic salts and a zwitterionic salt directed by an intermolecular and intramolecular metathesis strategy. *New Journal of Chemistry* **2018**, *42* (4), 2376-2380.
2. Dippold, A. A.; Klapotke, T. M., A study of dinitro-bis-1,2,4-triazole-1,1'-diol and derivatives: design of high-performance insensitive energetic materials by the introduction of N-oxides. *Journal of the American Chemical Society* **2013**, *135* (26), 9931-8.
3. Huang, S.; Tian, J.; Qi, X.; Wang, K.; Zhang, Q., Synthesis of gem-Dinitromethylated and Fluorodinitromethylated Derivatives of 5,5'-Dinitro-bis-1,2,4-triazole as Promising High-Energy-Density Materials. *Chemistry-A European Journal* **2017**, *23* (52), 12787-12794.
4. Yin, P.; Shreeve, J. M., From N-Nitro to N-Nitroamino: Preparation of High-Performance Energetic Materials by Introducing Nitrogen-Containing Ions. *Angewandte Chemie International Edition* **2016**, *54* (48), 14513-14517.
5. Xiang, F.; Zhu, W.; Xiao, H., Theoretical studies of energetic nitrogen-rich ionic salts composed of substituted 5-nitroiminotetrazolate anions and various cations. *Journal of Molecular Modeling* **2013**, *19* (8), 3103-3118.
6. Yang, G., Amine Salt-Catalyzed Synthesis of 5-Substituted 1-Tetrazoles from Nitriles. *Synthetic*

*Communications* **2010**, *40* (17), 2624-2632.
